# Supplementary material
Source: PubMed Central journal article supplement (PMC10353845)
Supplement: NIHMS1874213-supplement-Supplementary_Materials.pdf [file NIHMS1874213-supplement-Supplementary_Materials.pdf]

## SUPPLEMENTARY MATERIALS

### Materials and Methods

**Sample Preparation.** H-\*BEA was prepared from commercial CP814E NH<sub>4</sub>-\*BEA zeolite by calcination in static air at 550°C, as in refs. (6) and (7). H-CHA zeolite used for the preparation of the Fe-CHA samples was prepared following the CBV720 recipe with N,N,N-trimethyl-1-admantylammonium cations (TMAda<sup>+</sup>) template from ref. (35). A molar batch composition of 1 Si : 0.067 Al : 0.22 TMAda<sup>+</sup> : 0.13 Na<sup>+</sup> : 0.35 OH<sup>-</sup> : 24.5 H<sub>2</sub>O was targeted using zeolite Y (Zeolyst international CBV720) as the Si and Al source. 28.69 g of aqueous N,N,N-trimethyladamantylammonium hydroxide (TMAdaOH) solution (25 wt %, Sachem), 5.29 g of NaOH solution (15 wt%, from >98 wt% NaOH pellets, Sigma Aldrich) and 40.58 g of deionized water (18.2 MΩ cm) was mixed in a 125 ml Teflon lined stainless steel autoclave (Parr Instruments) and homogenized. 11.25 g of the zeolite Y precursor was then added and the mixture was stirred for 2 hours at ambient conditions. The autoclave was then sealed off and oven-heated at 160 °C for 4 days under static conditions.

Fe-CHA and Fe-\*BEA materials were prepared by a strategy analogous to the samples in refs (6), (7), and (36): Fe was introduced into dried H-CHA and H-\*BEA by diffusion impregnation in a solution of <sup>57</sup>Fe(acac)<sub>3</sub> in toluene (25 mL/g zeolite). The concentration of <sup>57</sup>Fe(acac)<sub>3</sub> in toluene is approximately 0.01 M. All samples were calcined in air with a heating ramp of 2 °C/min to 550 °C for 30 hours to remove organic

material. Each sample is then introduced into a quartz U-tube/flow cell and heated at 10°C/min in a dried 30 ml/min flow of helium (99.999% purity, O<sub>2</sub> filtered with an Agilent 17970 system, H<sub>2</sub>O filtered with an Agilent 17971 system) to 900°C where it is kept for one hour. The Fe-\*BEA and Fe-CHA materials studied here were compositionally similar with Si/Al ~ 10 and ~0.30 wt.% Fe. Sample specific Si/Al and iron loadings are given in the main manuscript.

**N<sub>2</sub>O Activation and CH<sub>4</sub>/H<sub>2</sub> Reactions.** ~0.5g of Fe zeolite is introduced into a quartz U-tube/flow cell. After heating to 900°C in helium (*vide supra*), a 35% N<sub>2</sub>O (99%, IJsfabriek Strombeek) in He flow is passed over the sample (20 min at 160°C for Fe-\*BEA, 25 min at 180°C for Fe-CHA to achieve maximal  $\alpha$ -Fe(IV)=O and minimal spectator). The reactor is flushed in helium at room temperature and a 20 mL/min flow of CH<sub>4</sub> (99.995%, Air Liquide) or H<sub>2</sub> (99.99%, Air Liquide) is passed through the flow cell at room temperature for 5 minutes, followed by another flush in helium. For the isotope labelled experiments CH<sub>4</sub> and H<sub>2</sub> were replaced by 99% labeled <sup>13</sup>CH<sub>4</sub> (99%, 99 atom% <sup>13</sup>C, Sigma Aldrich) and D<sub>2</sub> (99%, 99.9 atom% D, Sigma Aldrich) respectively.

**Catalyst Cycling Tests.** A known amount of Fe-\*BEA or Fe-CHA was put into a quartz reactor. The sample was pretreated in a dried helium flow at 900°C, then a 35% N<sub>2</sub>O/He atmosphere (large molar excess of N<sub>2</sub>O over iron) was inserted into the reactor at room temperature. The reactor was heated in the oven for 30 minutes at 180 °C for Fe-CHA and 160 °C for Fe-\*BEA to ensure full oxidation. Then the N<sub>2</sub>O/He was removed at room

temperature by a vacuum, and replaced by a 1.5 bar  $^{13}\text{CH}_4$  atmosphere (99%  $^{13}\text{C}$  labeled). After 15 minutes all  $^{13}\text{CH}_4$  was removed by a vacuum. For the single cycle experiments, methanol was extracted at this point in a 35 ml/min He stream that passed through a bubbler with water at room temperature. The outflow was monitored by in line mass spectrometry using an Omnistar Pfeiffer Vacuum GSD 30102 quadrupole mass spectrometer. For a second cycle experiment, the  $^{13}\text{CH}_4$  atmosphere was removed by vacuum and replaced by 35% $\text{N}_2\text{O}/\text{He}$ . The reactor was heated in the oven for 15 minutes at 180 °C for Fe-CHA and 160 °C for Fe-\*BEA. Then the  $\text{N}_2\text{O}/\text{He}$  was removed at room temperature by a vacuum, and replaced by a  $^{12}\text{CH}_4$  atmosphere. After 15 minutes methanol extraction was started. Different  $\text{N}_2\text{O}$  activation temperatures and durations were tested to optimize for  $\alpha\text{-Fe(II)}$  conversion and minimize overoxidation of first cycle oxidation products. Quantification of  $^{13}\text{C}$  and  $^{12}\text{C}$  methanol products was calibrated by a known amount of methanol adsorbed onto Fe-CHA and Fe-\*BEA and then extracted using the same procedure as for the reactive cycles. Exemplary mass spectrometry data are shown in Fig. S6. Mass spectrometry during  $\text{CH}_4$  reaction did not detect the gas phase release of methanol or other oxidation products. Products other than methanol were also not detected in quantifiable amounts during the steaming procedure. Nevertheless, the methanol yields (both  $^{13}\text{C}$  and  $^{12}\text{C}$ ) are ~30% below what is expected based on Mössbauer spectroscopy. We explain this by the sampling for Mössbauer from the part of the zeolite bed that is least exposed to contaminants. The Mössbauer data therefore does not quantitatively but only relatively represent the whole zeolite bed used for the reactivity tests.

Steam assisted extractions were similar for H and Na exchanged zeolites and for the CHA and BEA topologies (Fig. S7). Although the time required for methanol recovery differs markedly, the final outcome is similar for the purpose of this work.

**DR-UV-vis Spectroscopy.** Diffuse reflectance spectroscopy in the UV–vis–NIR energy range was performed with a Varian Cary 5000 UV-vis-NIR spectrophotometer at room temperature against a Halon white reflectance standard in the 4000-40000  $\text{cm}^{-1}$  energy range. All treatments before UV-vis-NIR spectroscopic measurements were performed in a quartz U-tube/flow cell, equipped with a window for *in situ* measurements.

**Mössbauer Spectroscopy.**  $^{57}\text{Fe}$  Mössbauer spectra were recorded with a See Co. W302 resonant gamma ray spectrometer in horizontal geometry at room temperature with zero external field using a 1.85 GBq source (Be window, Rh matrix). Data were collected from samples enriched with 100%  $^{57}\text{Fe}$ . Isomer shifts are given relative to  $\alpha$ -iron foil at room temperature. Spectra were collected with 1024 points and summed up to 512 points before analyzing. Spectra were fit to Lorentzian doublets and hyperfine-split multiplets using the Vinda software package for Microsoft Excel. Hyperfine features were fit using a spin Hamiltonian model (SPINHAM), using a vanishingly small external field. A slowly relaxing  $S=5/2$  model was required to fit the data. First, the  $\alpha$ -Fe(III)-OH component of  $\text{H}_2$ -reacted BEA was considered. Its isomer shift, quadrupole splitting, and hyperfine coupling tensor (constrained to be isotropic) were determined from the position of peripheral spectral lines, where there are no contributions from overlapping Lorentzian

components (i.e. above 4 mm/s and below -2 mm/s). The  $g$  tensor was constrained to be isotropic, with  $g=2.0023$ . The axial and rhombic zero-field splitting parameters  $D$  and  $E$  (respectively) were then floated to properly model the intensity distribution among these peripheral spectral lines, accounting for the 6K sample temperature. For the CH<sub>4</sub> reacted sample, the features of  $\alpha$ -Fe(III)-OH were subtracted from the experimental data to facilitate fitting of the remaining  $\alpha$ -Fe(III)-OCH<sub>3</sub> component.

**Resonance Raman Spectroscopy.** Resonance Raman (rR) spectra were recorded using a Spex 1877 CP triple monochromator with 1200, 1800, and 2400 grooves/mm holographic spectrograph gratings and an Andor Newton CCD cooled to  $-80$  °C. Excitation was provided by either a Coherent I90C-K Kr<sup>+</sup> ion laser ( $\lambda_{\text{ex}} = 407$ ) or an Innova Sabre 25/7 Ar<sup>+</sup> CW ion laser ( $\lambda_{\text{ex}} = 458, 502$  nm). The spectral resolution was  $\sim 2$  cm<sup>-1</sup>. Spectra were recorded at room temperature, using 20 mW of laser power at the sample. Baseline spectra were collected from samples of  $\alpha$ -Fe(IV)=O in BEA and CHA lattice.

**Spectroscopic Studies of Fe-CHA.** Mössbauer data from the H<sub>2</sub> and CH<sub>4</sub> reactions in CHA are presented in Fig. S1. For the H<sub>2</sub> reaction,  $\alpha$ -Fe(IV)=O (initially 84%) is converted into a new majority Fe(III) component (51% of Fe) with hyperfine structure. Based on its resemblance to  $\alpha$ -Fe(III)-OH in BEA, as well as rR data (see Fig. S5), we assign this as the CHA  $\alpha$ -Fe(III)-OH site (solid black trace, 61% of  $\alpha$ -Fe(IV)=O). Some  $\alpha$ -Fe(II) is also regenerated (21% of  $\alpha$ -Fe(IV)=O). The reaction of  $\alpha$ -Fe(IV)=O with H<sub>2</sub> therefore gives a

similar distribution of Fe species in CHA and BEA. For the CH<sub>4</sub> reaction, however, only ~60% of the  $\alpha$ -Fe(IV)=O is converted into  $\alpha$ -Fe(III)-OH/ $\alpha$ -Fe(III)-OCH<sub>3</sub>. Unlike BEA, a significant portion (~40% of  $\alpha$ -Fe(II)) is regenerated.

DR-UV-vis data from H<sub>2</sub>- and CH<sub>4</sub>-reacted CHA are presented in Fig. S5. As with BEA, reacting CHA with H<sub>2</sub> at 300 K (Fig. S5d) results in decay of the  $\alpha$ -Fe(IV)=O band (17,500 cm<sup>-1</sup>, gray trace), and leaves a rising slope with somewhat diminished Abs intensity from 20,000-30,000 cm<sup>-1</sup>. For the CH<sub>4</sub> reaction (Fig. S5e), there is additional Abs intensity at ~22,000 cm<sup>-1</sup>. Finally, a low energy band appears at 15,000 cm<sup>-1</sup> that is not present in the BEA sample. However, heating the sample to 450 K results in loss of this absorption feature, but with minimal change to its Mössbauer spectrum, suggesting this is due to a small quantity (<5%) of a strongly absorbing species. Tuning a laser ( $\nu_{\text{ex}}=21,800$  cm<sup>-1</sup>) into the Abs shoulder of the H<sub>2</sub>-reacted sample resonance enhances a single vibration at 730 cm<sup>-1</sup> (Fig. S5f, blue trace). We assign this to the  $\alpha$ -Fe(III)-OH species. No  $\alpha$ -Fe(III)-OH/ $\alpha$ -Fe(III)-OCH<sub>3</sub> features are resolved in the CH<sub>4</sub> reacted CHA sample (Fig. S5f, red trace). This is a key difference between CHA and BEA – consistent with Mössbauer data, which show a greatly diminished contribution from Fe(III) species in CH<sub>4</sub>-reacted CHA.

**Computational Details.** Spin-unrestricted DFT calculations were performed using Gaussian 09.(37) Cluster models were generated from crystallographic coordinates of BEA polymorph A (28) and CHA,(38) and dangling Si-O groups were replaced with capping hydrides at 1.42 Å (see supplementary tables 1-17 for coordinates). The B3LYP

functional was used for all calculations. For geometry optimizations and frequency calculations, the 6-311G\* basis set was used for Fe, all atoms directly coordinated to iron, and all atoms of the CH<sub>4</sub> substrate. The 6-31G\* basis set was used on all other atoms. For geometry optimizations, the six T-sites of the 6-membered ring hosting the iron center, and all atoms of the substrate were allowed to relax. All other atoms were constrained to their crystallographic positions. The stability of all optimized geometries were confirmed by frequency calculations. Guess transition state structures were located through linear transits of the Fe-OH...CH<sub>3</sub> distance, and then geometry optimized. Transition state structures were validated through frequency calculations, which showed a single imaginary frequency corresponding to motion along the reaction coordinate. Single point calculations were performed on optimized structures using the 6-311G+\* basis set on all atoms, and including the D3 dispersion correction of Grimme in the DFT functional.<sup>(39)</sup> All single point energies were corrected for thermal contributions to enthalpy and Gibbs free energy at 300K. Mössbauer isomer shifts and quadrupole splittings were calculated according to previously reported methods.<sup>(6)</sup>

## Supplementary Figures

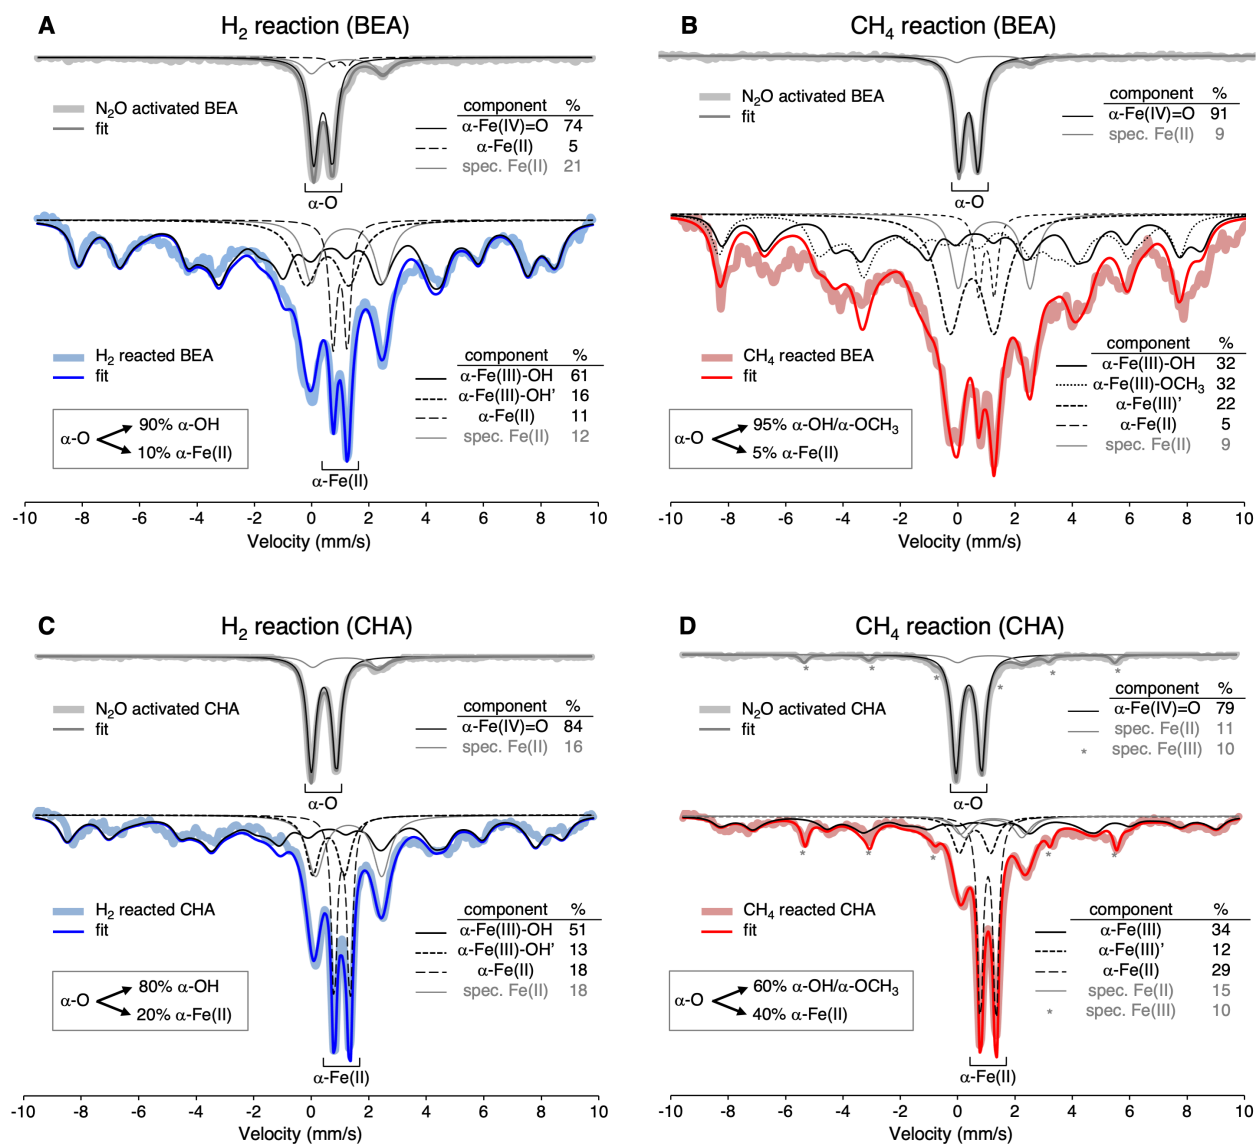

**Figure S1.** <sup>57</sup>Fe Mössbauer spectra of H<sub>2</sub>- and CH<sub>4</sub>-reacted Fe-CHA and Fe-BEA. Data were collected at 6K. Components of each fit are indicated in the figure legends. Data from the corresponding  $\alpha$ -Fe(IV)=O samples are presented above the spectrum of each reacted material (**A** – H<sub>2</sub>-reacted BEA, **B** – CH<sub>4</sub>-reacted BEA, **C** – H<sub>2</sub>-reacted CHA, **D** – CH<sub>4</sub>-reacted CHA).



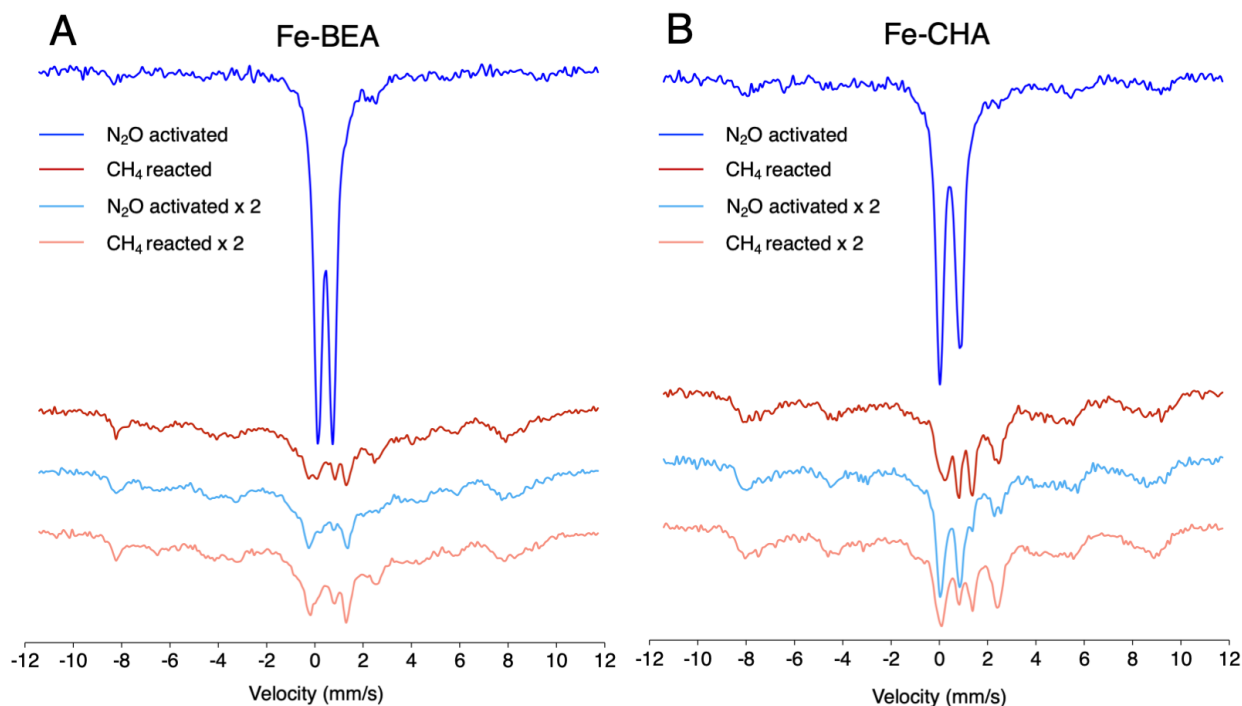

|                                     | component          | BEA (%) | CHA (%) |
|-------------------------------------|--------------------|---------|---------|
| <b>N<sub>2</sub>O activated</b>     | $\alpha$ -Fe(IV)=O | 90      | 74      |
|                                     | $\alpha$ -Fe(III)  | 0       | 0       |
|                                     | $\alpha$ -Fe(II)   | 0       | 0       |
| <b>CH<sub>4</sub> reacted</b>       | $\alpha$ -Fe(IV)=O | 0       | 0       |
|                                     | $\alpha$ -Fe(III)  | 85      | 46      |
|                                     | $\alpha$ -Fe(II)   | 5       | 28      |
| <b>N<sub>2</sub>O activated x 2</b> | $\alpha$ -Fe(IV)=O | 0       | 22      |
|                                     | $\alpha$ -Fe(III)  | 90      | 52      |
|                                     | $\alpha$ -Fe(II)   | 0       | 0       |
| <b>CH<sub>4</sub> reacted x 2</b>   | $\alpha$ -Fe(IV)=O | 0       | 0       |
|                                     | $\alpha$ -Fe(III)  | 90      | 54      |
|                                     | $\alpha$ -Fe(II)   | 0       | 20      |

**Figure S2.** Normalized 6K Mössbauer spectra from **(A)** Fe-\*BEA and **(B)** Fe-CHA collected over the course of catalyst cycling. Note regeneration of  $\alpha$ -Fe(IV)=O upon reoxidation in Fe-CHA, but not Fe-\*BEA (see pale blue traces). **(C)** Active site speciation over the course of catalyst cycling, as quantified from Mössbauer data in panels A and B. These values are associated with errors of  $\pm 5\%$ .

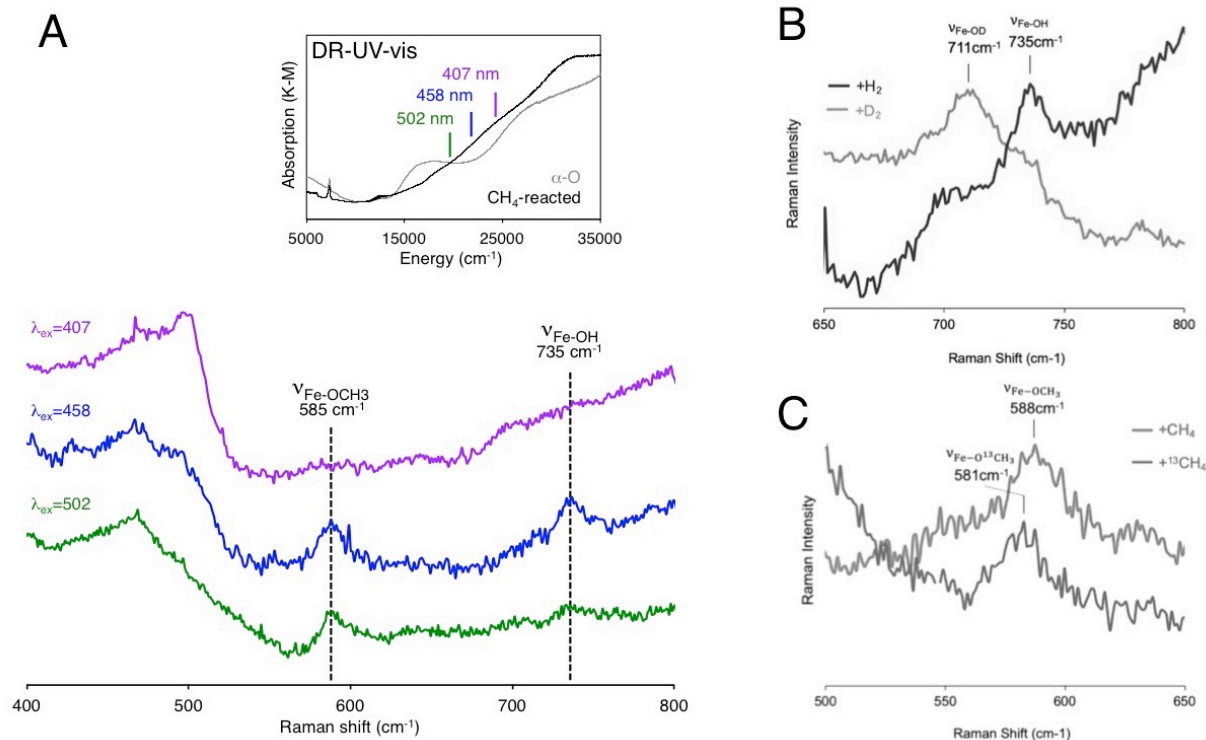

**Figure S3. (A)** Resonance Raman profile of the characteristic vibrations of  $\alpha$ -OH and  $\alpha$ -OCH<sub>3</sub> in CH<sub>4</sub>-reacted Fe-BEA. The intensities of both features are maximized using an excitation wavelength of 458 nm, indicating these Raman features are in resonance with electronic absorption bands within the 407-502 nm interval. To the right, isotopically perturbed resonance Raman data ( $\lambda_{ex}=458$  nm) are presented, focusing on the H/D sensitivity of the Fe-OH stretch of  $\alpha$ -OH in H<sub>2</sub>/D<sub>2</sub>-reacted Fe-BEA (**A**), and the <sup>12</sup>C/<sup>13</sup>C sensitivity of the Fe-OCH<sub>3</sub> stretch of  $\alpha$ -OCH<sub>3</sub> in <sup>12</sup>CH<sub>4</sub>/<sup>13</sup>CH<sub>4</sub>-reacted Fe-BEA (**B**). The hydrogen and methane reactions were all performed at 300K.

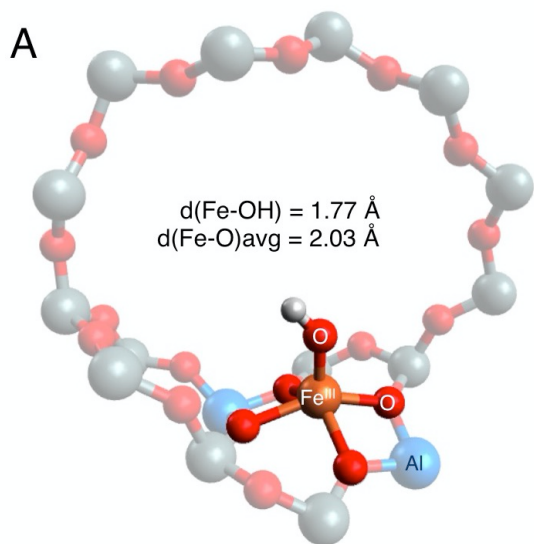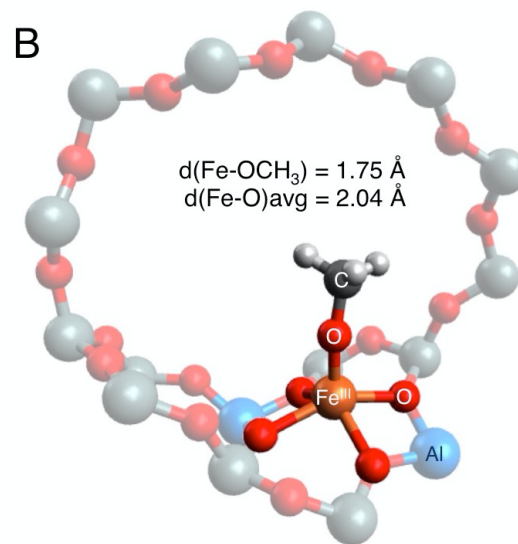

| $\alpha\text{-OH}$ | Mössbauer parameters |                | $\nu_{\text{Fe-OH}}$<br>( $\Delta\text{H/D}$ )<br>( $\text{cm}^{-1}$ ) | $\alpha\text{-OCH}_3$ | Mössbauer parameters |                | $\nu_{\text{Fe-OH}}$<br>( $\Delta^{12}\text{C}/^{13}\text{C}$ )<br>( $\text{cm}^{-1}$ ) |
|--------------------|----------------------|----------------|------------------------------------------------------------------------|-----------------------|----------------------|----------------|-----------------------------------------------------------------------------------------|
|                    | IS (mm/s)            | QS (mm/s)      |                                                                        |                       | IS (mm/s)            | QS (mm/s)      |                                                                                         |
| EXP                | $0.5 \pm 0.1$        | $-1.6 \pm 0.1$ | 735 (24)                                                               | EXP                   | $0.5 \pm 0.1$        | $-1.6 \pm 0.1$ | 585 (7)                                                                                 |
| DFT                | 0.41                 | -1.41          | 764 (32)                                                               | DFT                   | 0.47                 | -1.34          | 577 (6)                                                                                 |

**Figure S4.**  $S=5/2$  DFT models of  $\alpha\text{-OH}$  (**A**) and  $\alpha\text{-OCH}_3$  sites (**B**) in Fe-BEA, including a comparison of their experimental and calculated spectroscopic features in Mössbauer (IS = isomer shift, QS = quadrupole splitting) and resonance Raman spectroscopy. Atoms have been omitted for clarity.

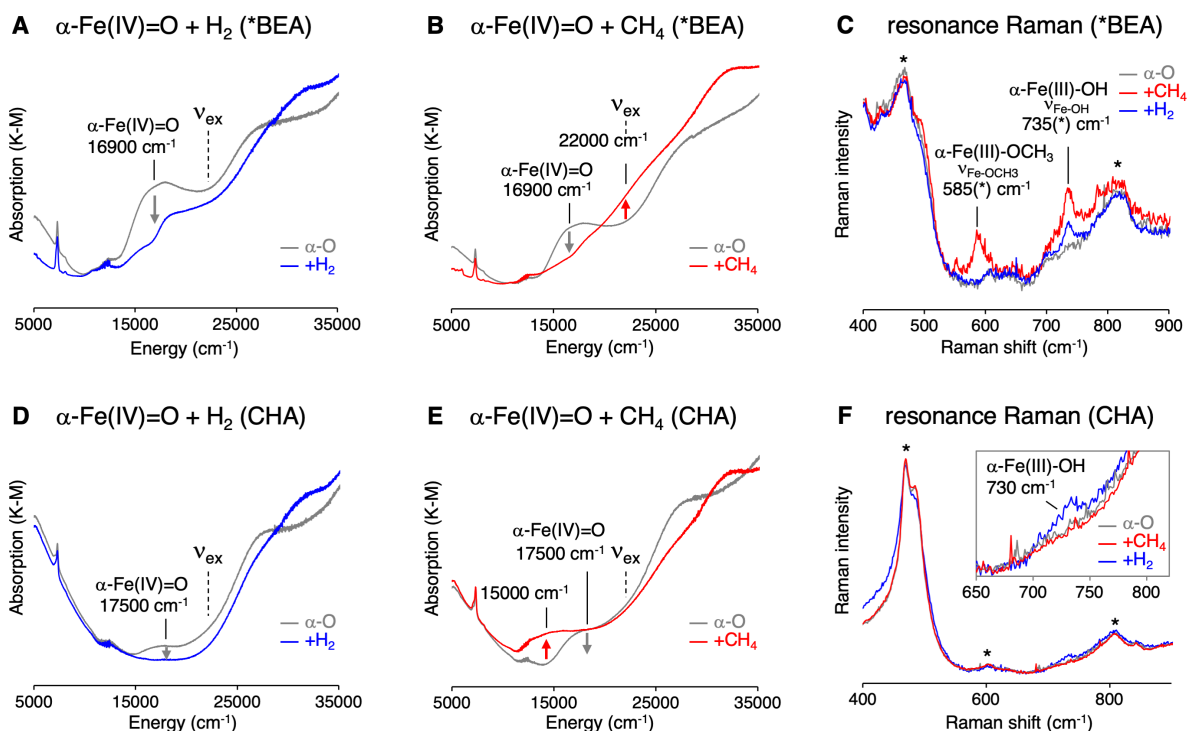

**Figure S5.** Comparison of DR-UV-vis and rR data ( $\lambda_{\text{ex}}=458$  nm) from  $\text{H}_2/\text{CH}_4$  reacted BEA (top) and CHA (bottom). All reactions were performed at 300 K. While rR features of the cage escape products  $\alpha\text{-Fe(III)-OH}$  and  $\alpha\text{-Fe(III)-OCH}_3$  are observed in  $\text{CH}_4$ -reacted BEA (panel C), these species are not detected in  $\text{CH}_4$ -reacted CHA. Cage escape products are only observed for the smaller substrate  $\text{H}_2$  (panel F). Starred features are non-resonant Raman vibrations of the zeolite lattice.

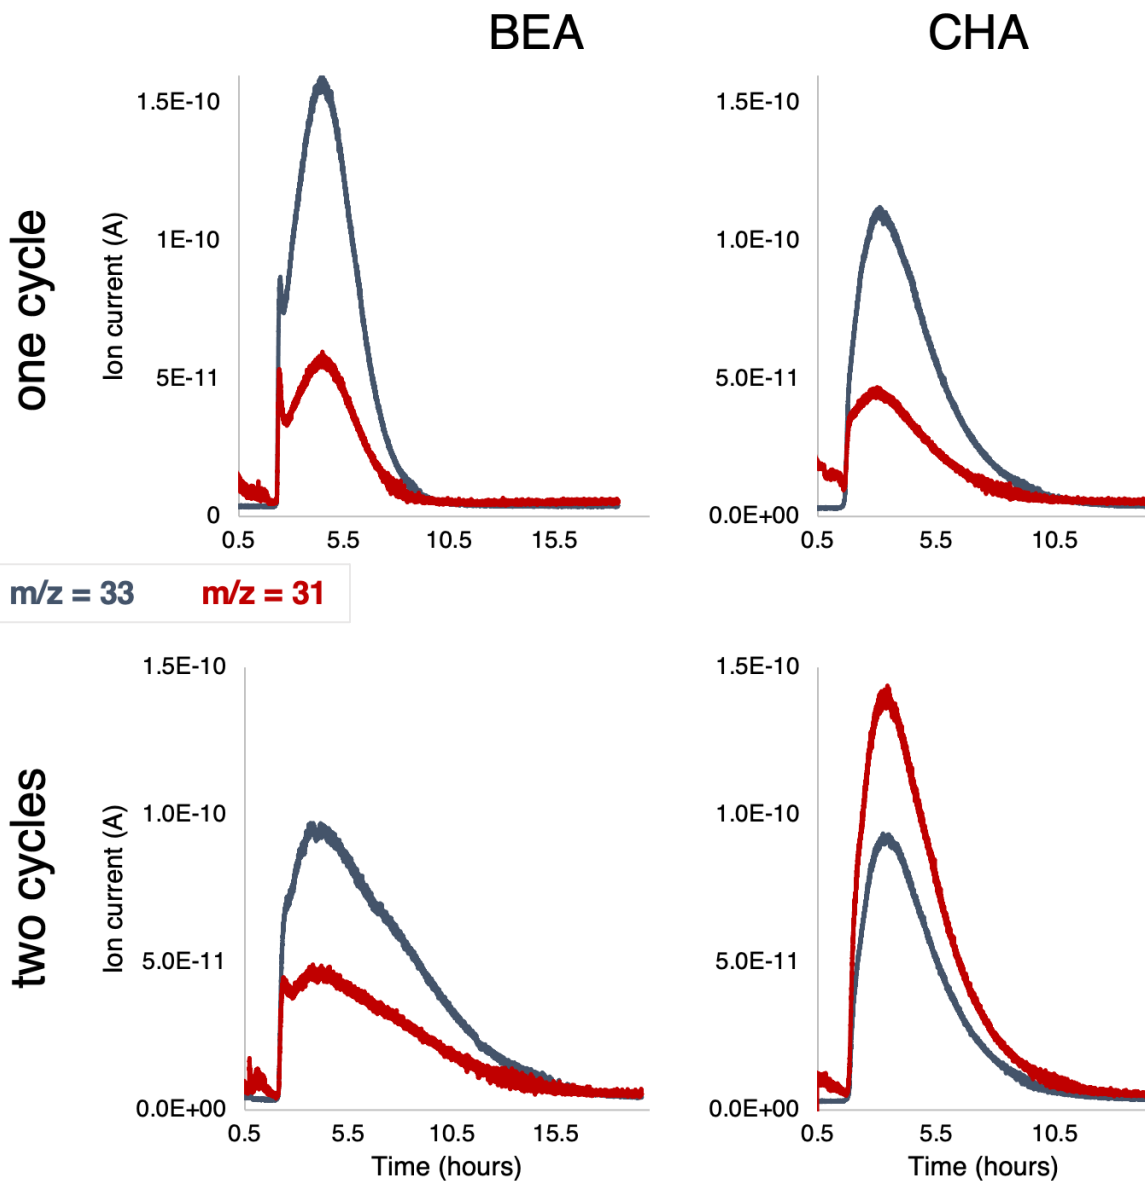

**Figure S6.** Selected mass spectrometry data used to quantify the steam desorbed  $^{13}\text{CH}_3\text{OH}$  and  $^{12}\text{CH}_3\text{OH}$ .  $m/z=33$  was used to quantify  $^{13}\text{CH}_3\text{OH}$ . The portion of the  $m/z=31$  signal attributed to  $^{13}\text{CH}_3\text{OH}$  was subtracted from the total signal to quantify  $^{12}\text{CH}_3\text{OH}$ .

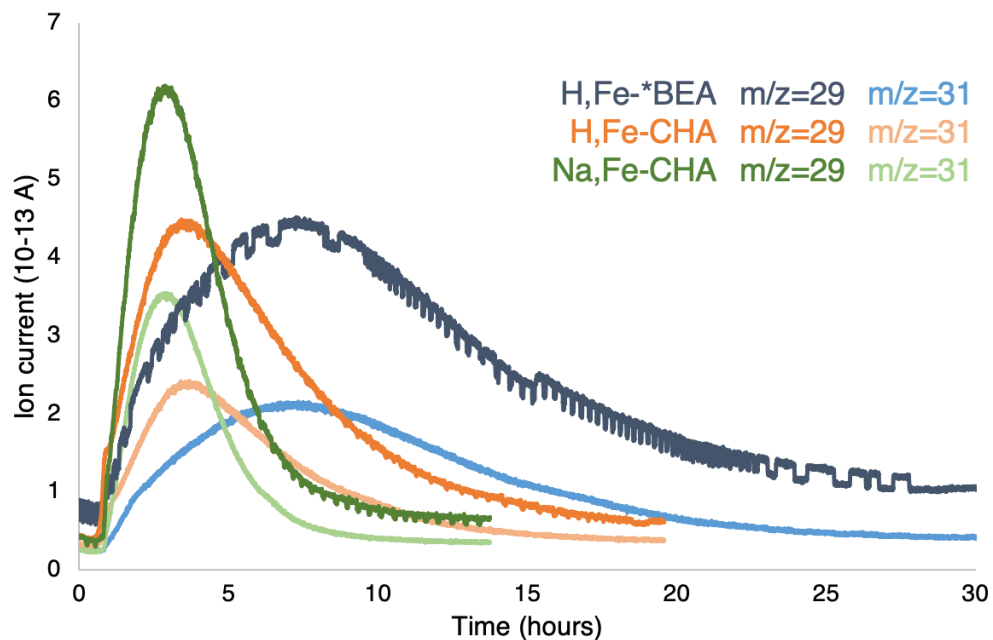

**Figure S7.** Methanol desorption by a flow of 30 mL/min He saturated with H<sub>2</sub>O at room temperature compared for the \*BEA vs. CHA topologies and for Na<sup>+</sup> vs H<sup>+</sup> exchanged CHA. Methanol was produced by a reaction of  $\alpha$ -O with methane at room temperature.

## Supplementary Tables

**Table S1 – Coordinates for DFT Model of  $\alpha$ -OH $\cdots$ CH<sub>3</sub> Complex (BEA)**

| element | constrained during optimization? | X           | Y           | Z           |
|---------|----------------------------------|-------------|-------------|-------------|
| Fe      | N                                | -0.88317713 | 0.2078925   | -0.30780668 |
| O       | N                                | -1.0400598  | -0.44184015 | 1.60450329  |
| O       | N                                | -2.37687441 | 0.25268539  | -1.68318867 |
| O       | N                                | -1.93334343 | 1.88022371  | 0.21946534  |
| O       | N                                | -0.84106095 | -1.84277563 | -0.51339426 |
| O       | N                                | 0.75101568  | 0.71266097  | -0.72332064 |
| H       | N                                | 1.65230655  | 0.48644183  | -0.43617148 |
| C       | N                                | 3.21305879  | -0.24578148 | 0.88023069  |
| H       | N                                | 3.13304826  | 0.65959271  | 1.46811711  |
| H       | N                                | 2.65000536  | -1.12165503 | 1.17712814  |
| H       | N                                | 4.03337029  | -0.34787691 | 0.18140014  |
| O       | Y                                | 4.87661135  | -4.44257331 | 0.30163545  |
| O       | Y                                | 1.27825899  | 5.77135874  | 0.64899151  |
| O       | Y                                | 6.93006414  | -2.79880345 | 0.15694788  |
| O       | Y                                | 6.04196136  | 4.42530407  | 0.03027365  |
| O       | Y                                | 3.71060695  | 5.56193854  | -0.34005062 |
| O       | Y                                | 7.15463405  | 2.24695049  | -0.92669782 |
| O       | Y                                | 7.53770541  | -0.32180801 | -0.50751246 |
| Si      | Y                                | 3.32319985  | -4.86647248 | 0.25003353  |
| Si      | Y                                | -0.31975761 | 5.56885478  | 0.68192352  |
| Si      | Y                                | 5.98373678  | -3.79995768 | -0.67419749 |
| Si      | Y                                | 7.30423865  | 3.43501077  | 0.1455109   |
| Si      | Y                                | 2.38113727  | 6.46630161  | -0.29602195 |
| Si      | Y                                | 7.58505566  | 0.85172085  | -1.60825877 |
| Si      | Y                                | 8.11782004  | -1.71583324 | 0.05034822  |
| Si      | Y                                | 5.203328    | 5.41191462  | -0.93008396 |
| O       | Y                                | 2.57809006  | -4.33650714 | 1.57477511  |
| Si      | Y                                | 1.20514996  | -4.24318502 | 2.41140011  |
| H       | Y                                | 0.72498441  | 0.22216818  | 6.48083059  |
| O       | Y                                | 2.63218595  | -4.22169495 | -1.05123203 |
| H       | Y                                | -0.86362965 | 5.85729448  | -0.59768194 |
| H       | Y                                | 7.37260057  | 2.89143817  | 1.455571    |
| H       | Y                                | 2.99572467  | -3.2083064  | -3.28320658 |
| H       | Y                                | 8.68835307  | -1.51596069 | 1.3352399   |
| H       | Y                                | 8.48622223  | 4.17916665  | -0.11053247 |
| H       | Y                                | 5.3278827   | -3.0748261  | -1.70396832 |
| H       | Y                                | 1.8632252   | 6.57139177  | -1.61401213 |

|    |   |             |             |             |
|----|---|-------------|-------------|-------------|
| H  | Y | 6.76597082  | -4.83091757 | -1.25868583 |
| H  | Y | 2.7000874   | 7.75475836  | 0.20850288  |
| H  | Y | 9.11683636  | -2.20172141 | -0.83411566 |
| H  | Y | 8.90445043  | 0.97342957  | -2.11893871 |
| H  | Y | 5.15098332  | 4.8672679   | -2.24043    |
| H  | Y | 6.68520139  | 0.54664373  | -2.66351801 |
| H  | Y | 5.82687181  | 6.68694693  | -0.97356146 |
| Si | Y | 2.02476692  | -3.89163911 | -2.50423579 |
| O  | N | -0.0069791  | 0.02802504  | 4.05761858  |
| O  | N | -2.84524028 | -0.01262259 | -4.33628098 |
| H  | Y | 0.81254472  | -1.82960421 | 5.40400638  |
| H  | Y | 3.22908059  | -6.28209649 | 0.18842809  |
| H  | Y | -4.21283594 | 4.21609455  | -4.11866462 |
| H  | Y | 1.50081345  | -4.13868655 | 3.79622425  |
| H  | Y | -2.61179643 | 5.31420437  | -2.85074504 |
| H  | Y | -1.23152514 | -0.95737013 | 6.07445221  |
| H  | Y | -5.25708837 | -0.3330108  | -5.11446855 |
| H  | Y | -3.94173059 | -1.20644052 | 5.29758307  |
| H  | Y | -6.61689752 | -1.55802481 | -2.95555335 |
| H  | Y | 1.66300639  | -5.09938037 | -3.15758428 |
| H  | Y | -0.88434447 | 6.44110335  | 1.64980538  |
| O  | N | 0.78236699  | -2.83971473 | -2.37288099 |
| O  | N | -0.550889   | 3.99749498  | 1.05214991  |
| O  | N | -0.93329768 | 1.99026324  | 2.65089395  |
| O  | N | -1.50007281 | -1.82494797 | -3.06699486 |
| O  | N | -2.63925551 | 0.20452577  | 3.67742707  |
| O  | N | -4.12166885 | -1.59107063 | -2.61180931 |
| H  | Y | -5.1244251  | 0.2113667   | 3.88579629  |
| H  | Y | -5.73872247 | -3.08613362 | -1.44034967 |
| O  | Y | -4.15970964 | -1.85095029 | 2.91533171  |
| H  | Y | -4.80957296 | 5.15973295  | 2.809539    |
| O  | Y | -5.82528084 | -0.70576163 | -0.76809888 |
| H  | Y | -2.08634563 | -6.59763456 | -1.71124899 |
| O  | N | -4.70897598 | 1.68675949  | -0.4926341  |
| H  | Y | -1.75220556 | -5.4596028  | 0.27397778  |
| O  | N | -2.24472889 | -3.16715043 | 1.60942187  |
| H  | Y | -5.02787416 | 4.0636545   | 0.78497986  |
| O  | N | -3.00128128 | 3.00435962  | -2.32174871 |
| H  | Y | 0.43034821  | -5.41048192 | 2.17983227  |
| O  | N | 0.53591137  | -2.83783967 | 1.94158606  |
| H  | Y | -4.71832796 | 4.91717127  | -1.96710834 |
| H  | Y | -6.15080497 | 0.70660986  | 1.23869362  |
| H  | Y | -3.6842613  | -5.0945297  | -0.96606054 |



|    |   |             |             |             |
|----|---|-------------|-------------|-------------|
| H  | Y | -4.62910758 | -3.55124479 | 1.17848673  |
| H  | Y | -5.30802453 | 2.89734291  | 2.77622182  |
| H  | Y | -7.16041854 | 1.3818953   | -0.73616746 |
| O  | N | -1.45110768 | -4.16661595 | -1.81069443 |
| H  | Y | -3.77103589 | -4.28139872 | 3.20479645  |
| O  | N | -2.96527547 | 3.60161245  | 2.07384681  |
| Si | Y | 0.05712837  | -0.63874217 | 5.57023429  |
| Si | Y | -4.01817743 | 0.26379672  | -5.46850182 |
| Si | N | -1.17249889 | 0.42884422  | 3.02084121  |
| Si | N | -2.74459067 | -0.78988245 | -2.93008988 |
| Si | Y | -4.01005516 | -0.6628577  | 3.98750595  |
| Si | Y | -5.62852639 | -1.76838418 | -1.95787707 |
| Al | N | -3.13641855 | 1.81341683  | -1.13164839 |
| Al | N | -0.88302309 | -2.21720719 | 1.25138142  |
| Si | Y | -6.00443507 | 0.78041402  | -0.17182709 |
| Si | Y | -2.29210997 | -5.36549847 | -1.03598896 |
| Si | Y | -3.72923507 | -3.24613987 | 2.23378664  |
| Si | Y | -4.58582977 | 3.93410279  | 2.12818444  |
| Si | N | -1.63279803 | 2.89898729  | 1.49627949  |
| Si | N | -0.75964507 | -2.71296991 | -1.92531086 |
| Si | Y | -3.69769648 | 4.40016792  | -2.80825149 |
| H  | Y | -4.16301828 | 1.67580886  | -5.50964355 |
| H  | Y | -3.61030004 | -0.20749562 | -6.74441532 |

**Table S2 – Coordinates for DFT Model of  $\alpha$ -Fe(II) (BEA)**

| <b>element</b> | <b>constrained during optimization?</b> | <b>X</b>    | <b>Y</b>    | <b>Z</b>    |
|----------------|-----------------------------------------|-------------|-------------|-------------|
| Fe             | N                                       | -1.12883888 | 0.10320115  | -0.21656273 |
| O              | N                                       | -0.95669034 | -0.46232606 | 1.67806171  |
| O              | N                                       | -2.38006755 | 0.28004486  | -1.74770877 |
| O              | N                                       | -1.87230785 | 1.92004893  | 0.18314947  |
| O              | N                                       | -0.72559543 | -1.84267712 | -0.49485712 |
| O              | Y                                       | 4.94558774  | -4.43295001 | 0.3203729   |
| O              | Y                                       | 1.34801784  | 5.78217523  | 0.63992601  |
| O              | Y                                       | 6.99958707  | -2.78975642 | 0.17683658  |
| O              | Y                                       | 6.11283216  | 4.43421721  | 0.03404538  |
| O              | Y                                       | 3.78244321  | 5.57045776  | -0.34349751 |
| O              | Y                                       | 7.22722346  | 2.25382251  | -0.91625629 |
| O              | Y                                       | 7.60901638  | -0.31416147 | -0.49119815 |
| Si             | Y                                       | 3.39223206  | -4.85672332 | 0.26628911  |

|    |   |             |             |             |
|----|---|-------------|-------------|-------------|
| Si | Y | -0.25008882 | 5.57997464  | 0.66984097  |
| Si | Y | 6.05488926  | -3.79240787 | -0.65435803 |
| Si | Y | 7.37471357  | 3.44397058  | 0.15392925  |
| Si | Y | 2.45301683  | 6.47509881  | -0.30409032 |
| Si | Y | 7.65889313  | 0.85719167  | -1.59414893 |
| Si | Y | 8.18772954  | -1.70716996 | 0.07064424  |
| Si | Y | 5.27640016  | 5.41905698  | -0.9300427  |
| O  | Y | 2.64438202  | -4.32405323 | 1.58840047  |
| Si | Y | 1.26966375  | -4.22887428 | 2.42188553  |
| H  | Y | 0.78145736  | 0.24455456  | 6.48148439  |
| O  | Y | 2.704092    | -4.21439524 | -1.03772303 |
| H  | Y | -0.7911904  | 5.8659687   | -0.61148552 |
| H  | Y | 7.44019418  | 2.90296724  | 1.46520016  |
| H  | Y | 3.07254949  | -3.20546414 | -3.27090739 |
| H  | Y | 8.75554567  | -1.50485016 | 1.35635652  |
| H  | Y | 8.55735233  | 4.18745002  | -0.10105195 |
| H  | Y | 5.40134515  | -3.06921069 | -1.68695405 |
| H  | Y | 1.93793779  | 6.57766828  | -1.62338951 |
| H  | Y | 6.83821786  | -4.82462959 | -1.23514268 |
| H  | Y | 2.77107989  | 7.76449924  | 0.19857752  |
| H  | Y | 9.18856242  | -2.19494208 | -0.81072449 |
| H  | Y | 8.9793949   | 0.97770386  | -2.10224611 |
| H  | Y | 5.22677505  | 4.87183918  | -2.23942399 |
| H  | Y | 6.76125093  | 0.55016805  | -2.6507268  |
| H  | Y | 5.90022515  | 6.69391106  | -0.97469686 |
| Si | Y | 2.09982881  | -3.88711335 | -2.49267638 |
| O  | N | 0.06284683  | 0.10200961  | 4.0902585   |
| O  | N | -2.74467337 | -0.04704576 | -4.38211772 |
| H  | Y | 0.87101099  | -1.80934599 | 5.40888958  |
| H  | Y | 3.29801954  | -6.27244536 | 0.20725802  |
| H  | Y | -4.13311217 | 4.21832532  | -4.13638188 |
| H  | Y | 1.56236278  | -4.12169756 | 3.80713269  |
| H  | Y | -2.53461622 | 5.31869375  | -2.86721211 |
| H  | Y | -1.1743574  | -0.93549513 | 6.07324611  |
| H  | Y | -5.17590393 | -0.33258811 | -5.12546182 |
| H  | Y | -3.8829308  | -1.18570719 | 5.29107787  |
| H  | Y | -6.54051057 | -1.55314484 | -2.96704774 |
| H  | Y | 1.73928256  | -5.09609267 | -3.14441136 |
| H  | Y | -0.81661821 | 6.45420081  | 1.63480057  |
| O  | N | 0.8586752   | -2.82983618 | -2.37915712 |
| O  | N | -0.4764637  | 4.00451433  | 1.03000645  |
| O  | N | -0.88270978 | 2.00231555  | 2.62543751  |
| O  | N | -1.42427486 | -1.81339575 | -3.04023414 |

|    |   |             |             |             |
|----|---|-------------|-------------|-------------|
| O  | N | -2.58215821 | 0.23701016  | 3.69301448  |
| O  | N | -4.05908255 | -1.6092377  | -2.650114   |
| H  | Y | -5.062398   | 0.22949071  | 3.87398002  |
| H  | Y | -5.66580375 | -3.07839904 | -1.44696866 |
| O  | Y | -4.09591657 | -1.83487079 | 2.90963848  |
| H  | Y | -4.74451271 | 5.17568389  | 2.7886595   |
| O  | Y | -5.75344016 | -0.69669442 | -0.77959309 |
| H  | Y | -2.01337515 | -6.59095677 | -1.70314456 |
| O  | N | -4.64751236 | 1.71438462  | -0.50138873 |
| H  | Y | -1.68330782 | -5.44906365 | 0.2805449   |
| O  | N | -2.18808524 | -3.15412089 | 1.58526527  |
| H  | Y | -4.95864676 | 4.07565573  | 0.76579898  |
| O  | N | -2.91396278 | 3.01176417  | -2.36281586 |
| H  | Y | 0.49517078  | -5.39650471 | 2.1909498   |
| O  | N | 0.60414085  | -2.82216998 | 1.98361439  |
| H  | Y | -4.64309021 | 4.92370948  | -1.98729486 |
| H  | Y | -6.0830435  | 0.71966884  | 1.22371881  |
| H  | Y | -3.61265717 | -5.08615517 | -0.96433631 |
| H  | Y | -4.56185308 | -3.5385155  | 1.17514492  |
| H  | Y | -5.24322414 | 2.91330441  | 2.75872925  |
| H  | Y | -7.08833766 | 1.39120941  | -0.75461774 |
| O  | N | -1.37448548 | -4.16001761 | -1.80276527 |
| H  | Y | -3.70822355 | -4.26480121 | 3.20471866  |
| O  | N | -2.89643547 | 3.63232163  | 2.05714146  |
| Si | Y | 0.1154217   | -0.61804675 | 5.57115903  |
| Si | Y | -3.936152   | 0.26334971  | -5.47803034 |
| Si | N | -1.10792523 | 0.45214418  | 3.04892912  |
| Si | N | -2.6884559  | -0.79859526 | -2.962902   |
| Si | Y | -3.9483813  | -0.64468503 | 3.97979586  |
| Si | Y | -5.55430415 | -1.76170588 | -1.96685747 |
| Al | N | -3.08729187 | 1.84254904  | -1.16560541 |
| Al | N | -0.80153797 | -2.21992559 | 1.28072638  |
| Si | Y | -5.93366132 | 0.79069511  | -0.18661926 |
| Si | Y | -2.22040236 | -5.35747053 | -1.03075807 |
| Si | Y | -3.66418475 | -3.23146486 | 2.23176469  |
| Si | Y | -4.51950263 | 3.94869207  | 2.1102012   |
| Si | N | -1.57262015 | 2.91939965  | 1.47686939  |
| Si | N | -0.67700176 | -2.71078598 | -1.9112984  |
| Si | Y | -3.62074899 | 4.40491193  | -2.82525113 |
| H  | Y | -4.08069853 | 1.67529606  | -5.52224516 |
| H  | Y | -3.52562135 | -0.21050944 | -6.75213146 |

**Table S3 – Coordinates for DFT Model of  $\alpha$ -O (BEA)**

| element | constrained during optimization? | X           | Y           | Z           |
|---------|----------------------------------|-------------|-------------|-------------|
| Fe      | N                                | -0.91671491 | 0.17603945  | -0.28283458 |
| O       | N                                | -1.00631261 | -0.44267911 | 1.6278311   |
| O       | N                                | -2.3666186  | 0.23921784  | -1.67295926 |
| O       | N                                | -1.86718256 | 1.85971359  | 0.21941703  |
| O       | N                                | -0.77442756 | -1.80711442 | -0.50276371 |
| O       | N                                | 0.49253807  | 0.69473342  | -0.80528232 |
| O       | Y                                | 4.92431485  | -4.45223802 | 0.32936005  |
| O       | Y                                | 1.3408724   | 5.76730625  | 0.66532759  |
| O       | Y                                | 6.98076239  | -2.81167126 | 0.19090354  |
| O       | Y                                | 6.10433749  | 4.41381069  | 0.06125501  |
| O       | Y                                | 3.77590579  | 5.55407073  | -0.3162491  |
| O       | Y                                | 7.21653202  | 2.23368335  | -0.89222701 |
| O       | Y                                | 7.59430578  | -0.33565401 | -0.47178009 |
| Si      | Y                                | 3.37040808  | -4.87372562 | 0.27302532  |
| Si      | Y                                | -0.2575663  | 5.56732953  | 0.69330328  |
| Si      | Y                                | 6.03542263  | -3.81137918 | -0.64310176 |
| Si      | Y                                | 7.36470794  | 3.42155221  | 0.18039299  |
| Si      | Y                                | 2.44772037  | 6.46052151  | -0.27631782 |
| Si      | Y                                | 7.64685949  | 0.83775567  | -1.57241807 |
| Si      | Y                                | 8.17053022  | -1.73056113 | 0.08790428  |
| Si      | Y                                | 5.27019146  | 5.40169192  | -0.90170181 |
| O       | Y                                | 2.62208921  | -4.34251704 | 1.59545854  |
| Si      | Y                                | 1.24664945  | -4.24693411 | 2.42782899  |
| H       | Y                                | 0.76108173  | 0.21923792  | 6.4956374   |
| O       | Y                                | 2.6843789   | -4.22788486 | -1.03037751 |
| H       | Y                                | -0.79706307 | 5.8565604   | -0.58789692 |
| H       | Y                                | 7.42820736  | 2.8779253   | 1.49067615  |
| H       | Y                                | 3.05634753  | -3.21516319 | -3.26126442 |
| H       | Y                                | 8.7374367   | -1.53152817 | 1.37453077  |
| H       | Y                                | 8.54863091  | 4.16385109  | -0.07205527 |
| H       | Y                                | 5.38385997  | -3.08526615 | -1.67490273 |
| H       | Y                                | 1.9340129   | 6.56635738  | -1.59589864 |
| H       | Y                                | 6.81783284  | -4.84358316 | -1.22515437 |
| H       | Y                                | 2.7671369   | 7.74848819  | 0.22912946  |
| H       | Y                                | 9.17149143  | -2.21804387 | -0.79347852 |
| H       | Y                                | 8.96800176  | 0.95738286  | -2.07905875 |
| H       | Y                                | 5.2210107   | 4.85707511  | -2.21218437 |
| H       | Y                                | 6.7497663   | 0.53404203  | -2.63041758 |
| H       | Y                                | 5.89585615  | 6.67574742  | -0.94331467 |

|    |   |             |             |             |
|----|---|-------------|-------------|-------------|
| Si | Y | 2.08196929  | -3.89694836 | -2.4852466  |
| O  | N | 0.03480766  | 0.03465076  | 4.07609949  |
| O  | N | -2.77407588 | -0.00927613 | -4.33499126 |
| H  | Y | 0.84872652  | -1.83270399 | 5.41915837  |
| H  | Y | 3.2742533   | -6.28917773 | 0.21116755  |
| H  | Y | -4.13800483 | 4.22046345  | -4.11907612 |
| H  | Y | 1.53831031  | -4.142948   | 3.81358004  |
| H  | Y | -2.5391601  | 5.31611279  | -2.8463067  |
| H  | Y | -1.19602386 | -0.95726345 | 6.08332217  |
| H  | Y | -5.18632007 | -0.32705993 | -5.11790854 |
| H  | Y | -3.90421286 | -1.20213952 | 5.2981505   |
| H  | Y | -6.5546532  | -1.54984045 | -2.96311442 |
| H  | Y | 1.72029122  | -5.10415226 | -3.13966181 |
| H  | Y | -0.82373802 | 6.44047945  | 1.65950386  |
| O  | N | 0.83979004  | -2.84147363 | -2.36105765 |
| O  | N | -0.49486008 | 3.99077958  | 1.04467572  |
| O  | N | -0.88378877 | 1.99159792  | 2.65998817  |
| O  | N | -1.43836757 | -1.81712505 | -3.05548652 |
| O  | N | -2.59942071 | 0.21608372  | 3.68679659  |
| O  | N | -4.06796105 | -1.60401688 | -2.63107386 |
| H  | Y | -5.08038665 | 0.21746078  | 3.88270789  |
| H  | Y | -5.68352521 | -3.07927502 | -1.44517909 |
| O  | Y | -4.1159038  | -1.84641691 | 2.91532497  |
| H  | Y | -4.75451019 | 5.16529369  | 2.80724728  |
| O  | Y | -5.76844832 | -0.69873186 | -0.77333166 |
| H  | Y | -2.03579429 | -6.59649371 | -1.70475958 |
| O  | N | -4.65243556 | 1.70205473  | -0.48579717 |
| H  | Y | -1.70596774 | -5.45890122 | 0.28143107  |
| O  | N | -2.2109951  | -3.15414251 | 1.58595664  |
| H  | Y | -4.96833368 | 4.06947714  | 0.78206813  |
| O  | N | -2.92765629 | 3.00833732  | -2.31948764 |
| H  | Y | 0.47082236  | -5.41312167 | 2.19395151  |
| O  | N | 0.56720348  | -2.84587645 | 1.97128005  |
| H  | Y | -4.64900616 | 4.9224383   | -1.9691203  |
| H  | Y | -6.09790428 | 0.71419138  | 1.23244788  |
| H  | Y | -3.63365116 | -5.09088331 | -0.96451501 |
| H  | Y | -4.58266724 | -3.54601413 | 1.17707446  |
| H  | Y | -5.25639211 | 2.9036907   | 2.77246794  |
| H  | Y | -7.10035951 | 1.39097968  | -0.74555779 |
| O  | N | -1.40187944 | -4.14287071 | -1.77417077 |
| H  | Y | -3.73190616 | -4.27741161 | 3.20603238  |
| O  | N | -2.91309445 | 3.59164476  | 2.05443655  |
| Si | Y | 0.09461771  | -0.6406435  | 5.58302212  |

|    |   |             |             |             |
|----|---|-------------|-------------|-------------|
| Si | Y | -3.94539248 | 0.2678036   | -5.4681443  |
| Si | N | -1.12707209 | 0.43391823  | 3.04182609  |
| Si | N | -2.69429523 | -0.79728156 | -2.93632018 |
| Si | Y | -3.9677119  | -0.65841852 | 3.98784093  |
| Si | Y | -5.56958208 | -1.76176385 | -1.96242874 |
| Al | N | -3.08557794 | 1.8198421   | -1.13503489 |
| Al | N | -0.83106996 | -2.214622   | 1.27119934  |
| Si | Y | -5.94707744 | 0.78775679  | -0.17744032 |
| Si | Y | -2.24173864 | -5.36394586 | -1.03022906 |
| Si | Y | -3.68553141 | -3.24229701 | 2.23497095  |
| Si | Y | -4.53048906 | 3.93929759  | 2.12659366  |
| Si | N | -1.57039102 | 2.89516745  | 1.49936172  |
| Si | N | -0.69530589 | -2.70118635 | -1.91430514 |
| Si | Y | -3.6266018  | 4.40364775  | -2.80698067 |
| H  | Y | -4.08791191 | 1.68003488  | -5.50979579 |
| H  | Y | -3.53435056 | -0.20417456 | -6.74280757 |

**Table S4 – Coordinates for DFT Model of  $\alpha$ -OH (BEA)**

| element | constrained during optimization? | X           | Y           | Z           |
|---------|----------------------------------|-------------|-------------|-------------|
| Fe      | N                                | -0.84673097 | 0.20228632  | -0.30335058 |
| O       | N                                | -0.99908053 | -0.4371057  | 1.61115894  |
| O       | N                                | -2.34219503 | 0.24565126  | -1.66945215 |
| O       | N                                | -1.87509261 | 1.87832175  | 0.22198741  |
| O       | N                                | -0.78982757 | -1.83840538 | -0.50020977 |
| O       | N                                | 0.75391944  | 0.69714192  | -0.86389625 |
| H       | N                                | 1.62063145  | 0.30266454  | -0.98581128 |
| O       | Y                                | 4.91208494  | -4.45498761 | 0.33673611  |
| O       | Y                                | 1.33281809  | 5.76581926  | 0.66872748  |
| O       | Y                                | 6.96819533  | -2.81525728 | 0.19921073  |
| O       | Y                                | 6.09614477  | 4.41008206  | 0.06841789  |
| O       | Y                                | 3.7685036   | 5.55132229  | -0.31099179 |
| O       | Y                                | 7.20809402  | 2.22933761  | -0.88394042 |
| O       | Y                                | 7.58445419  | -0.34017503 | -0.46307391 |
| Si      | Y                                | 3.35784438  | -4.87629668 | 0.27931788  |
| Si      | Y                                | -0.26565355 | 5.56645528  | 0.69562488  |
| Si      | Y                                | 6.02420609  | -3.81524059 | -0.63503391 |
| Si      | Y                                | 7.35598594  | 3.41728092  | 0.18863644  |
| Si      | Y                                | 2.44069235  | 6.45834559  | -0.27219654 |
| Si      | Y                                | 7.63831714  | 0.83313276  | -1.56362275 |

|    |   |             |             |             |
|----|---|-------------|-------------|-------------|
| Si | Y | 8.15972029  | -1.73529494 | 0.09782321  |
| Si | Y | 5.2631625   | 5.39820459  | -0.89529839 |
| O  | Y | 2.6087764   | -4.34495309 | 1.60110359  |
| Si | Y | 1.23313356  | -4.24823247 | 2.43266567  |
| H  | Y | 0.74617268  | 0.21872493  | 6.4993101   |
| O  | Y | 2.67322782  | -4.23025274 | -1.02468351 |
| H  | Y | -0.80411637 | 5.85578241  | -0.58613775 |
| H  | Y | 7.41825645  | 2.87379856  | 1.49903674  |
| H  | Y | 3.04727877  | -3.21797295 | -3.25541199 |
| H  | Y | 8.72551232  | -1.53612378 | 1.38448658  |
| H  | Y | 8.54042549  | 4.15902337  | -0.06301558 |
| H  | Y | 5.37373104  | -3.08894162 | -1.66746883 |
| H  | Y | 1.92802673  | 6.56425348  | -1.59216619 |
| H  | Y | 6.80652136  | -4.84787423 | -1.21609666 |
| H  | Y | 2.76029263  | 7.74625617  | 0.23333591  |
| H  | Y | 9.16106854  | -2.2232972  | -0.78303637 |
| H  | Y | 8.95989318  | 0.95210804  | -2.06928191 |
| H  | Y | 5.21472924  | 4.85343799  | -2.20574425 |
| H  | Y | 6.74188902  | 0.52967562  | -2.62226042 |
| H  | Y | 5.88942157  | 6.6719782   | -0.93660641 |
| Si | Y | 2.07203909  | -3.89932126 | -2.48000431 |
| O  | N | 0.01969752  | 0.02586564  | 4.07447106  |
| O  | N | -2.78308135 | -0.01081375 | -4.33014602 |
| H  | Y | 0.83372217  | -1.83341178 | 5.42317048  |
| H  | Y | 3.26129072  | -6.29164115 | 0.21765393  |
| H  | Y | -4.14314917 | 4.22069113  | -4.11960376 |
| H  | Y | 1.52351255  | -4.14407387 | 3.81840425  |
| H  | Y | -2.54477643 | 5.31584783  | -2.84577908 |
| H  | Y | -1.21114092 | -0.95696235 | 6.08566415  |
| H  | Y | -5.19269866 | -0.32646414 | -5.1186344  |
| H  | Y | -3.91886512 | -1.20073953 | 5.29849918  |
| H  | Y | -6.56318761 | -1.54838179 | -2.96473637 |
| H  | Y | 1.71030646  | -5.10635063 | -3.13457987 |
| H  | Y | -0.83226423 | 6.44003203  | 1.66114582  |
| O  | N | 0.83608434  | -2.8348601  | -2.3521504  |
| O  | N | -0.50217742 | 3.99515225  | 1.06128894  |
| O  | N | -0.89486463 | 1.99065543  | 2.66259589  |
| O  | N | -1.4452312  | -1.82318199 | -3.05391205 |
| O  | N | -2.608863   | 0.2071799   | 3.67674359  |
| O  | N | -4.07134424 | -1.59459267 | -2.61830977 |
| H  | Y | -5.09329881 | 0.21919578  | 3.88195363  |
| H  | Y | -5.69388047 | -3.07799643 | -1.44595201 |
| O  | Y | -4.12891878 | -1.84513323 | 2.91542377  |

|    |   |             |             |             |
|----|---|-------------|-------------|-------------|
| H  | Y | -4.7644209  | 5.16673254  | 2.80610548  |
| O  | Y | -5.77842685 | -0.69735751 | -0.77442547 |
| H  | Y | -2.04754521 | -6.59685054 | -1.7023138  |
| O  | N | -4.6582699  | 1.69559204  | -0.49115668 |
| H  | Y | -1.71869341 | -5.45914924 | 0.28399011  |
| O  | N | -2.21766884 | -3.15906153 | 1.60415505  |
| H  | Y | -4.97719853 | 4.07073885  | 0.78091327  |
| O  | N | -2.94114345 | 3.00552284  | -2.31876304 |
| H  | Y | 0.45661454  | -5.41402926 | 2.1981137   |
| O  | N | 0.55852339  | -2.8461634  | 1.96834617  |
| H  | Y | -4.65544797 | 4.92313546  | -1.97011659 |
| H  | Y | -6.10859636 | 0.71604906  | 1.23088735  |
| H  | Y | -3.64526306 | -5.09040451 | -0.96347727 |
| H  | Y | -4.59520382 | -3.54485288 | 1.17719573  |
| H  | Y | -5.26728714 | 2.90534315  | 2.77126219  |
| H  | Y | -7.10926885 | 1.39302477  | -0.74793448 |
| O  | N | -1.40221806 | -4.1661173  | -1.79712555 |
| H  | Y | -3.7463547  | -4.27638762 | 3.20689152  |
| O  | N | -2.92171567 | 3.60099292  | 2.07049065  |
| Si | Y | 0.08007292  | -0.64105714 | 5.58641198  |
| Si | Y | -3.9511515  | 0.26778246  | -5.46799418 |
| Si | N | -1.13649622 | 0.42960376  | 3.03134226  |
| Si | N | -2.69403362 | -0.79132786 | -2.92524023 |
| Si | Y | -3.98112716 | -0.65728318 | 3.98814575  |
| Si | Y | -5.57887893 | -1.76051173 | -1.9632497  |
| Al | N | -3.0847148  | 1.81762632  | -1.12715349 |
| Al | N | -0.84579878 | -2.21498176 | 1.26809327  |
| Si | Y | -5.95635911 | 0.78927257  | -0.1790747  |
| Si | Y | -2.25341202 | -5.36422199 | -1.02804471 |
| Si | Y | -3.69876662 | -3.24150891 | 2.23594663  |
| Si | Y | -4.54045264 | 3.94049848  | 2.12579388  |
| Si | N | -1.58506172 | 2.89898877  | 1.50433197  |
| Si | N | -0.7102836  | -2.71373844 | -1.9107719  |
| Si | Y | -3.63247027 | 4.40391989  | -2.80719698 |
| H  | Y | -4.09310483 | 1.68008184  | -5.50997434 |
| H  | Y | -3.5394727  | -0.20454351 | -6.74231845 |



**Table S5 – Coordinates for DFT Model of  $\alpha$ -OCH<sub>3</sub> (BEA)**

| element | constrained during optimization? | X           | Y           | Z           |
|---------|----------------------------------|-------------|-------------|-------------|
| Fe      | N                                | -0.8592125  | 0.19339361  | -0.29282275 |
| O       | N                                | -1.02665169 | -0.45587964 | 1.62262601  |
| O       | N                                | -2.35571336 | 0.2527359   | -1.67079623 |
| O       | N                                | -1.91023793 | 1.87569731  | 0.24556535  |
| O       | N                                | -0.81393149 | -1.85066386 | -0.50270537 |
| O       | N                                | 0.71212542  | 0.80126276  | -0.75806112 |
| C       | N                                | 1.89271544  | 1.55277248  | -0.81872581 |
| H       | N                                | 1.74691806  | 2.52455531  | -0.33619774 |
| H       | N                                | 2.6979614   | 1.01736257  | -0.30582234 |
| H       | N                                | 2.17471855  | 1.7069376   | -1.86479575 |
| O       | Y                                | 4.85187037  | -4.51956881 | 0.34093809  |
| O       | Y                                | 1.3514797   | 5.72804685  | 0.69735929  |
| O       | Y                                | 6.92206372  | -2.8955436  | 0.21267284  |
| O       | Y                                | 6.10526905  | 4.3372355   | 0.10183303  |
| O       | Y                                | 3.78727529  | 5.49765916  | -0.27844718 |
| O       | Y                                | 7.20206881  | 2.15082576  | -0.85509165 |
| O       | Y                                | 7.55764422  | -0.42273467 | -0.44116205 |
| Si      | Y                                | 3.29471279  | -4.92811915 | 0.27929173  |
| Si      | Y                                | -0.24859466 | 5.54113351  | 0.72057867  |
| Si      | Y                                | 5.97076934  | -3.88503545 | -0.6267278  |
| Si      | Y                                | 7.35714039  | 3.3343232   | 0.22137885  |
| Si      | Y                                | 2.4664686   | 6.4148542   | -0.23935959 |
| Si      | Y                                | 7.62273429  | 0.75339088  | -1.53822606 |
| Si      | Y                                | 8.12092499  | -1.8239426  | 0.11595495  |
| Si      | Y                                | 5.28180717  | 5.33471813  | -0.86041981 |
| O       | Y                                | 2.54728138  | -4.39463255 | 1.60131111  |
| Si      | Y                                | 1.17048091  | -4.2901793  | 2.43036983  |
| H       | Y                                | 0.71077156  | 0.16801925  | 6.50989423  |
| O       | Y                                | 2.61745815  | -4.27289233 | -1.02401209 |
| H       | Y                                | -0.78232624 | 5.83845894  | -0.56121217 |
| H       | Y                                | 7.41270855  | 2.78639604  | 1.53023099  |
| H       | Y                                | 3.00362914  | -3.25679959 | -3.25095003 |
| H       | Y                                | 8.68603628  | -1.63330044 | 1.40464048  |
| H       | Y                                | 8.5477755   | 4.06760739  | -0.02579177 |
| H       | Y                                | 5.32791694  | -3.15060941 | -1.65810941 |
| H       | Y                                | 1.95714154  | 6.52873717  | -1.55996463 |
| H       | Y                                | 6.74622627  | -4.92193406 | -1.20973864 |
| H       | Y                                | 2.7950958   | 7.69869287  | 0.27068905  |
| H       | Y                                | 9.1201861   | -2.3170676  | -0.76421824 |

|    |   |             |             |             |
|----|---|-------------|-------------|-------------|
| H  | Y | 8.94614981  | 0.86363792  | -2.04104525 |
| H  | Y | 5.2316311   | 4.7943255   | -2.17261107 |
| H  | Y | 6.72598603  | 0.46012097  | -2.59945992 |
| H  | Y | 5.91800672  | 6.60371031  | -0.89666762 |
| Si | Y | 2.02164933  | -3.93282448 | -2.47951977 |
| O  | N | -0.01244916 | -0.00124912 | 4.08818702  |
| O  | N | -2.79913337 | 0.00034769  | -4.32823746 |
| H  | Y | 0.7844363   | -1.881438   | 5.42765304  |
| H  | Y | 3.18711889  | -6.34255139 | 0.21304979  |
| H  | Y | -4.12721258 | 4.24009962  | -4.10591085 |
| H  | Y | 1.45930153  | -4.19260402 | 3.81714853  |
| H  | Y | -2.52281019 | 5.31888833  | -2.8257601  |
| H  | Y | -1.2548174  | -0.99117248 | 6.08900077  |
| H  | Y | -5.21013176 | -0.29575632 | -5.12077167 |
| H  | Y | -3.96283659 | -1.21153437 | 5.296014    |
| H  | Y | -6.59415231 | -1.51350784 | -2.97315548 |
| H  | Y | 1.65181063  | -5.13510043 | -3.1383686  |
| H  | Y | -0.81015792 | 6.41606766  | 1.68780397  |
| O  | N | 0.78674115  | -2.87036429 | -2.36727561 |
| O  | N | -0.48934716 | 3.96395776  | 1.07105754  |
| O  | N | -0.91171541 | 1.9704297   | 2.67848771  |
| O  | N | -1.47970367 | -1.82545486 | -3.05355578 |
| O  | N | -2.64000709 | 0.19495069  | 3.68379611  |
| O  | N | -4.10425229 | -1.57395828 | -2.62142031 |
| H  | Y | -5.12357331 | 0.22177439  | 3.88164412  |
| H  | Y | -5.73961837 | -3.05443606 | -1.45741569 |
| O  | Y | -4.17348831 | -1.84713566 | 2.91076536  |
| H  | Y | -4.75429692 | 5.16986076  | 2.82150042  |
| O  | Y | -5.80678218 | -0.67523329 | -0.77884292 |
| H  | Y | -2.1201833  | -6.60071787 | -1.71768811 |
| O  | N | -4.67586401 | 1.71339136  | -0.49699566 |
| H  | Y | -1.78628746 | -5.47162894 | 0.27266537  |
| O  | N | -2.27264688 | -3.16338923 | 1.59324518  |
| H  | Y | -4.97171774 | 4.08172158  | 0.79257373  |
| O  | N | -2.92960176 | 3.0157564   | -2.3025749  |
| H  | Y | 0.38572539  | -5.44926628 | 2.19102076  |
| O  | N | 0.50160657  | -2.88324973 | 1.97645762  |
| H  | Y | -4.63812438 | 4.93999698  | -1.95525839 |
| H  | Y | -6.12995195 | 0.73452714  | 1.23018536  |
| H  | Y | -3.70758706 | -5.08418654 | -0.97725187 |
| H  | Y | -4.64956709 | -3.53779944 | 1.1663401   |
| H  | Y | -5.27459957 | 2.9125618   | 2.7787948   |
| H  | Y | -7.12159339 | 1.42524684  | -0.74845621 |

|    |   |             |             |             |
|----|---|-------------|-------------|-------------|
| O  | N | -1.46330123 | -4.16926521 | -1.80046721 |
| H  | Y | -3.81022177 | -4.28203142 | 3.1953827   |
| O  | N | -2.9152999  | 3.61843152  | 2.09414905  |
| Si | Y | 0.03970907  | -0.68370607 | 5.59304082  |
| Si | Y | -3.96345094 | 0.28990607  | -5.46604215 |
| Si | N | -1.16428047 | 0.40638095  | 3.04051947  |
| Si | N | -2.71804872 | -0.78319476 | -2.92303524 |
| Si | Y | -4.01839862 | -0.66351522 | 3.98715087  |
| Si | Y | -5.61351908 | -1.73641399 | -1.97052749 |
| Al | N | -3.09519279 | 1.81956129  | -1.11913249 |
| Al | N | -0.8878703  | -2.23253576 | 1.2626404   |
| Si | Y | -5.97478897 | 0.81095351  | -0.17910129 |
| Si | Y | -2.31779361 | -5.3685133  | -1.04011574 |
| Si | Y | -3.75277689 | -3.24453857 | 2.22748192  |
| Si | Y | -4.53855345 | 3.94405763  | 2.13788652  |
| Si | N | -1.59719311 | 2.88557752  | 1.52237701  |
| Si | N | -0.75100454 | -2.72558608 | -1.91204167 |
| Si | Y | -3.61780121 | 4.41528547  | -2.79198805 |
| H  | Y | -4.09426421 | 1.70338198  | -5.50390997 |
| H  | Y | -3.55291993 | -0.18172244 | -6.74096699 |

**Table S6 – Coordinates for DFT Model of C-O Recombination TS (BEA)**

| element | constrained during optimization? | X           | Y           | Z           |
|---------|----------------------------------|-------------|-------------|-------------|
| Fe      | N                                | -0.88618006 | 0.20844731  | -0.29585694 |
| O       | N                                | -1.05297281 | -0.43907767 | 1.62043272  |
| O       | N                                | -2.37610343 | 0.24640971  | -1.67837952 |
| O       | N                                | -1.94760098 | 1.8832949   | 0.2292295   |
| O       | N                                | -0.8105164  | -1.83401901 | -0.50705038 |
| O       | N                                | 0.7422407   | 0.80886032  | -0.67061895 |
| H       | N                                | 1.28635252  | 1.5784887   | -0.48836409 |
| C       | N                                | 3.10023815  | -0.46753597 | -0.06997848 |
| H       | N                                | 3.70511097  | 0.33058103  | 0.3393772   |
| H       | N                                | 2.59619764  | -1.15529723 | 0.59363855  |
| H       | N                                | 3.08430711  | -0.63820456 | -1.13550146 |
| O       | Y                                | 4.88581737  | -4.4356887  | 0.33753518  |
| O       | Y                                | 1.2693725   | 5.77257892  | 0.66306481  |
| O       | Y                                | 6.93713558  | -2.78864727 | 0.19988652  |
| O       | Y                                | 6.03771593  | 4.43390052  | 0.06442378  |
| O       | Y                                | 3.70600621  | 5.56644199  | -0.31606467 |

|    |   |             |             |             |
|----|---|-------------|-------------|-------------|
| O  | Y | 7.15778324  | 2.25668951  | -0.88650291 |
| O  | Y | 7.54337856  | -0.31113549 | -0.46392635 |
| Si | Y | 3.33332698  | -4.86217118 | 0.28001801  |
| Si | Y | -0.32842242 | 5.56748379  | 0.68973809  |
| Si | Y | 5.99578969  | -3.79194864 | -0.63432077 |
| Si | Y | 7.30114196  | 3.44576333  | 0.18543635  |
| Si | Y | 2.37489106  | 6.46865433  | -0.27801949 |
| Si | Y | 7.5932189   | 0.86167972  | -1.5653236  |
| Si | Y | 8.12353394  | -1.70380646 | 0.0972643   |
| Si | Y | 5.20132513  | 5.41844472  | -0.90000147 |
| O  | Y | 2.58205508  | -4.33248896 | 1.60138929  |
| Si | Y | 1.20561363  | -4.24080822 | 2.43241844  |
| H  | Y | 0.70181274  | 0.22667225  | 6.49665828  |
| O  | Y | 2.64647612  | -4.2194486  | -1.02447904 |
| H  | Y | -0.86763969 | 5.85410793  | -0.59224156 |
| H  | Y | 7.36514055  | 2.90324274  | 1.49615322  |
| H  | Y | 3.0172991   | -3.20707544 | -3.25571285 |
| H  | Y | 8.68858311  | -1.50207563 | 1.38428722  |
| H  | Y | 8.48292186  | 4.19167374  | -0.0664065  |
| H  | Y | 5.3428826   | -3.06863386 | -1.66723708 |
| H  | Y | 1.86209564  | 6.5719482   | -1.59815126 |
| H  | Y | 6.78204908  | -4.82204252 | -1.21492242 |
| H  | Y | 2.68970495  | 7.75799316  | 0.22684622  |
| H  | Y | 9.12688374  | -2.18868822 | -0.78283635 |
| H  | Y | 8.91444982  | 0.98518674  | -2.07079884 |
| H  | Y | 5.15512692  | 4.87277292  | -2.21015288 |
| H  | Y | 6.6981041   | 0.55436973  | -2.62396009 |
| H  | Y | 5.82294876  | 6.69446675  | -0.94190231 |
| Si | Y | 2.044348    | -3.89143313 | -2.4801519  |
| O  | N | -0.02343086 | 0.03920489  | 4.07595948  |
| O  | N | -2.82483916 | -0.01941877 | -4.33373095 |
| H  | Y | 0.79704803  | -1.82572498 | 5.42167873  |
| H  | Y | 3.24175998  | -6.27798447 | 0.21904953  |
| H  | Y | -4.20001242 | 4.20488974  | -4.12543099 |
| H  | Y | 1.49553102  | -4.13483636 | 3.81834287  |
| H  | Y | -2.60586408 | 5.30653061  | -2.8519049  |
| H  | Y | -1.25111937 | -0.95636258 | 6.0832937   |
| H  | Y | -5.23280366 | -0.34664309 | -5.12212104 |
| H  | Y | -3.95777358 | -1.21044176 | 5.29574857  |
| H  | Y | -6.59925364 | -1.57232937 | -2.96778438 |
| H  | Y | 1.68718566  | -5.10024112 | -3.13406378 |
| H  | Y | -0.89831844 | 6.439491    | 1.65472275  |
| O  | N | 0.79761179  | -2.8436859  | -2.36976179 |

|    |   |             |             |             |
|----|---|-------------|-------------|-------------|
| O  | N | -0.54858291 | 3.98626749  | 1.04266313  |
| O  | N | -0.94753953 | 1.99513975  | 2.66018707  |
| O  | N | -1.48247513 | -1.82758495 | -3.05635085 |
| O  | N | -2.65538772 | 0.21028054  | 3.68437438  |
| O  | N | -4.10786966 | -1.60221467 | -2.61837524 |
| H  | Y | -5.13712237 | 0.20441116  | 3.87820835  |
| H  | Y | -5.72465954 | -3.09791174 | -1.44797033 |
| O  | Y | -4.16514592 | -1.85701392 | 2.91310945  |
| H  | Y | -4.82606626 | 5.15251413  | 2.79963895  |
| O  | Y | -5.81780733 | -0.71720236 | -0.77779748 |
| H  | Y | -2.06547571 | -6.60360982 | -1.70168176 |
| O  | N | -4.71262248 | 1.68421001  | -0.50541892 |
| H  | Y | -1.74116117 | -5.46360386 | 0.28404055  |
| O  | N | -2.24916821 | -3.16045109 | 1.60090859  |
| H  | Y | -5.03444968 | 4.0546292   | 0.77501468  |
| O  | N | -2.98562377 | 3.00069945  | -2.32022377 |
| H  | Y | 0.43364559  | -5.40953258 | 2.19858163  |
| O  | N | 0.52667047  | -2.84067493 | 1.96560567  |
| H  | Y | -4.71526782 | 4.90667936  | -1.97642634 |
| H  | Y | -6.1536893  | 0.69606895  | 1.22665443  |
| H  | Y | -3.66882717 | -5.10259342 | -0.96399565 |
| H  | Y | -4.62478903 | -3.55932385 | 1.1756293   |
| H  | Y | -5.32066917 | 2.88928592  | 2.76596111  |
| H  | Y | -7.15648527 | 1.36827798  | -0.75272227 |
| O  | N | -1.43651059 | -4.16531504 | -1.79389069 |
| H  | Y | -3.77365485 | -4.28661301 | 3.20589118  |
| O  | N | -2.97014659 | 3.62079364  | 2.07528018  |
| Si | Y | 0.0390251   | -0.63598232 | 5.58401608  |
| Si | Y | -3.99346425 | 0.25194994  | -5.47162767 |
| Si | N | -1.18490748 | 0.43048969  | 3.0323473   |
| Si | N | -2.73109713 | -0.7980431  | -2.92708556 |
| Si | Y | -4.02174209 | -0.66790228 | 3.98502069  |
| Si | Y | -5.61454638 | -1.78037401 | -1.96601106 |
| Al | N | -3.13578021 | 1.80662946  | -1.13347924 |
| Al | N | -0.87928837 | -2.21131964 | 1.26031156  |
| Si | Y | -6.00179919 | 0.76912145  | -0.18331201 |
| Si | Y | -2.27596732 | -5.37133561 | -1.02814987 |
| Si | Y | -3.72964818 | -3.25198684 | 2.23430777  |
| Si | Y | -4.59759213 | 3.92677409  | 2.12007698  |
| Si | N | -1.64554584 | 2.90063395  | 1.50404411  |
| Si | N | -0.74062483 | -2.71436646 | -1.91298029 |
| Si | Y | -3.69043532 | 4.39075655  | -2.81311301 |
| H  | Y | -4.14045576 | 1.6636894   | -5.51435624 |

|   |   |             |             |            |
|---|---|-------------|-------------|------------|
| H | Y | -3.57970558 | -0.21958455 | -6.7455468 |
|---|---|-------------|-------------|------------|

**Table S7 – Coordinates for DFT Model of  $\alpha$ -MeOH (BEA)**

| <b>element</b> | <b>constrained during optimization?</b> | <b>X</b>    | <b>Y</b>    | <b>Z</b>    |
|----------------|-----------------------------------------|-------------|-------------|-------------|
| Fe             | N                                       | -0.87493352 | 0.20179363  | -0.30248982 |
| O              | N                                       | -1.03191452 | -0.4772009  | 1.65429081  |
| O              | N                                       | -2.40134985 | 0.23750702  | -1.69300219 |
| O              | N                                       | -1.94130703 | 1.95823977  | 0.18720259  |
| O              | N                                       | -0.74770353 | -1.87526633 | -0.50682239 |
| O              | N                                       | 0.88647998  | 1.29258603  | -0.2116378  |
| H              | N                                       | 0.7508182   | 2.23251501  | -0.01363312 |
| C              | N                                       | 2.11106502  | 0.81270246  | 0.40400945  |
| H              | N                                       | 2.01810547  | 0.83468201  | 1.4896733   |
| H              | N                                       | 2.24989768  | -0.21056128 | 0.06425877  |
| H              | N                                       | 2.94548428  | 1.42954035  | 0.07201882  |
| O              | Y                                       | 4.86222375  | -4.50175858 | 0.32392216  |
| O              | Y                                       | 1.32971847  | 5.73640801  | 0.63172018  |
| O              | Y                                       | 6.92661469  | -2.8718311  | 0.17822878  |
| O              | Y                                       | 6.08579872  | 4.35746043  | 0.02695722  |
| O              | Y                                       | 3.76264124  | 5.50804845  | -0.35169763 |
| O              | Y                                       | 7.18619915  | 2.16889832  | -0.92086971 |
| O              | Y                                       | 7.55170103  | -0.40095558 | -0.492804   |
| Si             | Y                                       | 3.306199    | -4.91570932 | 0.27049828  |
| Si             | Y                                       | -0.26963826 | 5.54440954  | 0.66203665  |
| Si             | Y                                       | 5.97546997  | -3.86943969 | -0.65168013 |
| Si             | Y                                       | 7.34137065  | 3.35935241  | 0.14788813  |
| Si             | Y                                       | 2.43899864  | 6.4211711   | -0.31322922 |
| Si             | Y                                       | 7.60890536  | 0.76874804  | -1.59714859 |
| Si             | Y                                       | 8.12160551  | -1.7969487  | 0.07063202  |
| Si             | Y                                       | 5.25554136  | 5.34645529  | -0.93821387 |
| O              | Y                                       | 2.56189504  | -4.37672721 | 1.59205232  |
| Si             | Y                                       | 1.18790051  | -4.27182016 | 2.42556286  |
| H              | Y                                       | 0.72859132  | 0.20943266  | 6.47990083  |
| O              | Y                                       | 2.62201567  | -4.27056499 | -1.03420526 |
| H              | Y                                       | -0.80904953 | 5.83231922  | -0.61957338 |
| H              | Y                                       | 7.40355231  | 2.81949879  | 1.45979321  |
| H              | Y                                       | 2.99663863  | -3.26664594 | -3.26862207 |
| H              | Y                                       | 8.6908364   | -1.59671944 | 1.35604583  |
| H              | Y                                       | 8.52868543  | 4.09499349  | -0.10809451 |

|    |   |             |             |             |
|----|---|-------------|-------------|-------------|
| H  | Y | 5.32642561  | -3.14332613 | -1.68506719 |
| H  | Y | 1.92443889  | 6.52544955  | -1.63259697 |
| H  | Y | 6.75215575  | -4.90730955 | -1.23131897 |
| H  | Y | 2.76530904  | 7.70911782  | 0.18787637  |
| H  | Y | 9.11922062  | -2.29211991 | -0.81025859 |
| H  | Y | 8.93009145  | 0.88025818  | -2.10552191 |
| H  | Y | 5.20229524  | 4.79801204  | -2.24693992 |
| H  | Y | 6.70921423  | 0.46618623  | -2.6532706  |
| H  | Y | 5.88745552  | 6.6172627   | -0.98444351 |
| Si | Y | 2.01968775  | -3.94117256 | -2.48948461 |
| O  | N | -0.00089567 | 0.06494848  | 4.08122606  |
| O  | N | -2.81945973 | -0.05036195 | -4.35043728 |
| H  | Y | 0.80496602  | -1.84626599 | 5.40973451  |
| H  | Y | 3.20297956  | -6.3308725  | 0.21315631  |
| H  | Y | -4.16176378 | 4.20178235  | -4.14217424 |
| H  | Y | 1.48142568  | -4.1648645  | 3.81065218  |
| H  | Y | -2.55616521 | 5.29346766  | -2.87447259 |
| H  | Y | -1.23473192 | -0.95863924 | 6.07326066  |
| H  | Y | -5.23358062 | -0.34357713 | -5.12574895 |
| H  | Y | -3.94492642 | -1.19254959 | 5.29166388  |
| H  | Y | -6.60568631 | -1.55287148 | -2.96575053 |
| H  | Y | 1.65139022  | -5.14860652 | -3.13974833 |
| H  | Y | -0.83049217 | 6.42336406  | 1.62601567  |
| O  | N | 0.7879022   | -2.87591182 | -2.39889864 |
| O  | N | -0.46387488 | 3.9495379   | 1.01747896  |
| O  | N | -0.92837877 | 1.9827154   | 2.62847584  |
| O  | N | -1.49288076 | -1.8472495  | -3.046787   |
| O  | N | -2.64027773 | 0.22864479  | 3.69694634  |
| O  | N | -4.12051997 | -1.61724204 | -2.63423801 |
| H  | Y | -5.11552461 | 0.2284386   | 3.87300752  |
| H  | Y | -5.74053094 | -3.08185358 | -1.44395163 |
| O  | Y | -4.16229468 | -1.84316883 | 2.91101804  |
| H  | Y | -4.76631146 | 5.17121964  | 2.78178777  |
| O  | Y | -5.81294805 | -0.6988504  | -0.77939325 |
| H  | Y | -2.11054033 | -6.61786718 | -1.69632964 |
| O  | N | -4.69905515 | 1.70915586  | -0.51457936 |
| H  | Y | -1.77300292 | -5.47574493 | 0.28597019  |
| O  | N | -2.2635486  | -3.16825164 | 1.58748661  |
| H  | Y | -4.98765599 | 4.07017779  | 0.76025552  |
| O  | N | -2.95892751 | 2.98532139  | -2.35889162 |
| H  | Y | 0.40597332  | -5.43477486 | 2.19609087  |
| O  | N | 0.51797619  | -2.86705513 | 1.97282015  |
| H  | Y | -4.66701242 | 4.9129428   | -1.99387416 |

|    |   |             |             |             |
|----|---|-------------|-------------|-------------|
| H  | Y | -6.13332053 | 0.72195437  | 1.2222701   |
| H  | Y | -3.70014072 | -5.10205129 | -0.95914543 |
| H  | Y | -4.63924355 | -3.54587142 | 1.17859409  |
| H  | Y | -5.27940224 | 2.9120235   | 2.75459196  |
| H  | Y | -7.13453902 | 1.39752784  | -0.75675988 |
| O  | N | -1.45064962 | -4.19282593 | -1.79828309 |
| H  | Y | -3.79002911 | -4.27516369 | 3.20894152  |
| O  | N | -2.90919754 | 3.68290215  | 2.08169025  |
| Si | Y | 0.05698504  | -0.64999457 | 5.57066695  |
| Si | Y | -3.99010269 | 0.24404654  | -5.4791496  |
| Si | N | -1.17313151 | 0.41859019  | 3.02599014  |
| Si | N | -2.73957246 | -0.80994169 | -2.92774361 |
| Si | Y | -4.00707782 | -0.65267736 | 3.97974768  |
| Si | Y | -5.62071743 | -1.76651353 | -1.96541337 |
| Al | N | -3.12104493 | 1.80439445  | -1.15446412 |
| Al | N | -0.88205328 | -2.22483776 | 1.25468125  |
| Si | Y | -5.98364296 | 0.79035701  | -0.18816623 |
| Si | Y | -2.30964666 | -5.38229307 | -1.02538609 |
| Si | Y | -3.73952608 | -3.2432827  | 2.23475796  |
| Si | Y | -4.54918199 | 3.9420183   | 2.10476289  |
| Si | N | -1.62855547 | 2.90557653  | 1.48493314  |
| Si | N | -0.74804548 | -2.74124449 | -1.91014412 |
| Si | Y | -3.64808201 | 4.38666151  | -2.83131772 |
| H  | Y | -4.12567267 | 1.65682999  | -5.52502483 |
| H  | Y | -3.58273207 | -0.2339239  | -6.75272911 |

**Table S8 – Coordinates for DFT Model of MeOH-Lattice Complex (BEA)**

| <b>element</b> | <b>constrained during optimization?</b> | <b>X</b>    | <b>Y</b>    | <b>Z</b>    |
|----------------|-----------------------------------------|-------------|-------------|-------------|
| O              | N                                       | -1.06942049 | -0.66917138 | 1.77002981  |
| O              | N                                       | -2.32789161 | 0.30915243  | -1.75601242 |
| O              | N                                       | -1.9133366  | 2.05713545  | 0.21464748  |
| O              | N                                       | -0.86053165 | -2.16769033 | -0.36864897 |
| O              | N                                       | 0.07851261  | 0.68211435  | -1.07646296 |
| H              | N                                       | -0.2223849  | 1.16237376  | -0.28533347 |
| C              | N                                       | 0.82140306  | 1.56988289  | -1.9275306  |
| H              | N                                       | 1.70434428  | 1.93669941  | -1.40094447 |
| H              | N                                       | 1.13441994  | 0.98656233  | -2.79144607 |
| H              | N                                       | 0.20725948  | 2.413284    | -2.25485835 |
| O              | Y                                       | 4.84905553  | -4.49380269 | 0.33423381  |



|    |   |             |             |             |
|----|---|-------------|-------------|-------------|
| O  | Y | 1.33777062  | 5.74865296  | 0.72827339  |
| O  | Y | 6.91775098  | -2.86717533 | 0.21521131  |
| O  | Y | 6.09371241  | 4.36516371  | 0.13301002  |
| O  | Y | 3.77501161  | 5.52478289  | -0.24540725 |
| O  | Y | 7.19393641  | 2.18381215  | -0.83149995 |
| O  | Y | 7.55162155  | -0.39106187 | -0.42768271 |
| Si | Y | 3.29239766  | -4.90366671 | 0.26894236  |
| Si | Y | -0.26228637 | 5.55982543  | 0.74871516  |
| Si | Y | 5.96851447  | -3.85418166 | -0.62942921 |
| Si | Y | 7.34645673  | 3.36304141  | 0.25000871  |
| Si | Y | 2.45321697  | 6.44049882  | -0.20419216 |
| Si | Y | 7.61687805  | 0.78961982  | -1.51983261 |
| Si | Y | 8.11563814  | -1.79396995 | 0.12438773  |
| Si | Y | 5.27043227  | 5.36574856  | -0.82617283 |
| O  | Y | 2.5427636   | -4.3764491  | 1.59221663  |
| Si | Y | 1.16490037  | -4.27674899 | 2.41995591  |
| H  | Y | 0.69546102  | 0.164236    | 6.51717682  |
| O  | Y | 2.61613724  | -4.24386776 | -1.03252268 |
| H  | Y | -0.79456742 | 5.8621718   | -0.53247421 |
| H  | Y | 7.40095383  | 2.80980624  | 1.55666988  |
| H  | Y | 3.00401137  | -3.21823708 | -3.25478717 |
| H  | Y | 8.678947    | -1.60804238 | 1.4145508   |
| H  | Y | 8.53664997  | 4.09854164  | 0.00733556  |
| H  | Y | 5.32619944  | -3.11618472 | -1.6585937  |
| H  | Y | 1.94542464  | 6.55925016  | -1.52497393 |
| H  | Y | 6.74575588  | -4.88789335 | -1.21571587 |
| H  | Y | 2.77990171  | 7.72253622  | 0.3115098   |
| H  | Y | 9.11649869  | -2.28246547 | -0.75654943 |
| H  | Y | 8.94080698  | 0.90327194  | -2.02054028 |
| H  | Y | 5.22244444  | 4.83069219  | -2.14063165 |
| H  | Y | 6.72175293  | 0.49979472  | -2.58338012 |
| H  | Y | 5.90538182  | 6.63552366  | -0.85642199 |
| Si | Y | 2.02153652  | -3.89819838 | -2.48715379 |
| O  | N | -0.01725854 | 0.02791329  | 4.11523276  |
| O  | N | -2.77133179 | -0.05197932 | -4.38182566 |
| H  | Y | 0.77259692  | -1.88071258 | 5.42667972  |
| H  | Y | 3.18633682  | -6.31794915 | 0.1967795   |
| H  | Y | -4.13342236 | 4.27492205  | -4.08789035 |
| H  | Y | 1.45183864  | -4.18453976 | 3.80750018  |
| H  | Y | -2.5316979  | 5.35004184  | -2.80125968 |
| H  | Y | -1.26837986 | -0.99521543 | 6.08910221  |
| H  | Y | -5.2104524  | -0.25785138 | -5.12274607 |
| H  | Y | -3.97520068 | -1.21502377 | 5.2918271   |

|    |   |             |             |             |
|----|---|-------------|-------------|-------------|
| H  | Y | -6.5958668  | -1.48587541 | -2.98185917 |
| H  | Y | 1.65401278  | -5.09831255 | -3.151615   |
| H  | Y | -0.82574024 | 6.43047721  | 1.71885457  |
| O  | N | 0.78540851  | -2.84617173 | -2.34855394 |
| O  | N | -0.48467331 | 4.01314419  | 1.20067597  |
| O  | N | -0.92347128 | 1.89886918  | 2.62247829  |
| O  | N | -1.45639825 | -1.80531318 | -2.96803884 |
| O  | N | -2.65618388 | 0.20116204  | 3.71963311  |
| O  | N | -4.10397122 | -1.54290768 | -2.62050849 |
| H  | Y | -5.13560581 | 0.22286032  | 3.88190977  |
| H  | Y | -5.7416357  | -3.03209968 | -1.47139736 |
| O  | Y | -4.18223947 | -1.841084   | 2.90365093  |
| H  | Y | -4.77003602 | 5.17559813  | 2.84249622  |
| O  | Y | -5.81204316 | -0.65577754 | -0.78304167 |
| H  | Y | -2.11829404 | -6.57356055 | -1.74167605 |
| O  | N | -4.67210696 | 1.69592304  | -0.51714954 |
| H  | Y | -1.78804991 | -5.45237509 | 0.25375146  |
| O  | N | -2.22009021 | -3.11570472 | 1.66059436  |
| H  | Y | -4.98389019 | 4.09561301  | 0.80885788  |
| O  | N | -2.97106471 | 3.01232318  | -2.33461117 |
| H  | Y | 0.38154096  | -5.43561705 | 2.1749009   |
| O  | N | 0.37668121  | -2.9111599  | 1.92353512  |
| H  | Y | -4.64771362 | 4.96539136  | -1.93498546 |
| H  | Y | -6.1391818  | 0.74544393  | 1.23128303  |
| H  | Y | -3.70817917 | -5.06174698 | -0.99704588 |
| H  | Y | -4.65439432 | -3.52507389 | 1.15175566  |
| H  | Y | -5.28803663 | 2.91800685  | 2.78993176  |
| H  | Y | -7.12911807 | 1.44325147  | -0.74572426 |
| O  | N | -1.46711115 | -4.23114509 | -1.93635162 |
| H  | Y | -3.81684499 | -4.27679627 | 3.17877762  |
| O  | N | -2.92806895 | 3.62990408  | 2.19240348  |
| Si | Y | 0.02644828  | -0.68442846 | 5.59575011  |
| Si | Y | -3.96380939 | 0.33051562  | -5.46378732 |
| Si | N | -1.18130503 | 0.36045416  | 3.044126    |
| Si | N | -2.71420393 | -0.79830674 | -2.95971316 |
| Si | Y | -4.02960777 | -0.6618972  | 3.98499767  |
| Si | Y | -5.61631346 | -1.71170838 | -1.9787642  |
| Si | N | -0.92610165 | -2.20475243 | 1.25617743  |
| Si | Y | -5.98246284 | 0.82779082  | -0.17764699 |
| Si | Y | -2.31794849 | -5.34426264 | -1.05911882 |
| Si | Y | -3.75927739 | -3.23533471 | 2.21537142  |
| Si | Y | -4.55227438 | 3.95270909  | 2.1539684   |
| Si | N | -1.61959664 | 2.91149279  | 1.54826463  |

|    |   |             |             |             |
|----|---|-------------|-------------|-------------|
| Si | N | -0.75132602 | -2.77806397 | -1.86848614 |
| Si | Y | -3.6257276  | 4.44527522  | -2.77274006 |
| H  | Y | -4.09617182 | 1.7439631   | -5.49627357 |
| H  | Y | -3.55134862 | -0.13552178 | -6.74033631 |
| H  | N | -1.31549439 | 0.3412137   | -1.52681502 |
| Al | N | -3.06823854 | 1.87640144  | -1.06777356 |

**Table S9 – Coordinates for DFT Model of  $\alpha$ -OH...CH<sub>3</sub> Complex (CHA)**

| element | constrained during optimization? | X           | Y           | Z           |
|---------|----------------------------------|-------------|-------------|-------------|
| Fe      | N                                | 0.43956566  | 0.0002841   | 0.76787327  |
| O       | N                                | -0.07750667 | 1.5082483   | -0.56037765 |
| O       | N                                | 1.65230782  | 1.69061476  | 1.20644832  |
| O       | N                                | 1.65103493  | -1.69017097 | 1.20759459  |
| O       | N                                | -0.07860585 | -1.50806352 | -0.55923202 |
| O       | N                                | -0.80588079 | 0.0013323   | 1.99839168  |
| H       | N                                | -1.78985265 | 0.00333617  | 2.02433995  |
| C       | N                                | -3.63709433 | 0.00033431  | 1.51924325  |
| H       | N                                | -3.62152262 | 0.9302752   | 0.96785195  |
| H       | N                                | -3.6190251  | -0.93042656 | 0.96930704  |
| H       | N                                | -4.01060369 | 0.00046853  | 2.53496541  |
| O       | N                                | -1.73231354 | 0.00064424  | -1.9567264  |
| O       | N                                | -2.33307251 | 2.43309357  | -1.80977368 |
| O       | N                                | -2.3336837  | -2.4309627  | -1.81074441 |
| O       | Y                                | -4.18054375 | 3.3137707   | -0.17803865 |
| O       | Y                                | -6.0538145  | 2.43860121  | 1.44080375  |
| O       | Y                                | -4.17956345 | -3.31324777 | -0.17943522 |
| O       | Y                                | -7.01118632 | 0.0001211   | 1.26158047  |
| O       | Y                                | -6.05294263 | -2.43941297 | 1.44006774  |
| Si      | N                                | -1.06841561 | 1.46863281  | -1.89096819 |
| Si      | N                                | -1.06840732 | -1.46732644 | -1.89049771 |
| Si      | Y                                | -5.23680809 | 3.73949866  | 0.95855558  |
| Si      | Y                                | -3.1226263  | -3.73898055 | -1.31677176 |
| Si      | Y                                | -7.39841183 | 1.55121008  | 1.43477609  |
| Si      | Y                                | -5.23582919 | -3.73952417 | 0.95682368  |
| Si      | Y                                | -7.39771442 | -1.55279845 | 1.43468822  |
| Si      | Y                                | -3.12434191 | 3.74004679  | -1.31571904 |
| O       | N                                | -0.22681486 | 1.81614298  | -3.22097441 |
| O       | N                                | -0.22662535 | -1.81620306 | -3.21996429 |
| O       | N                                | 3.19485237  | 0.00014075  | 2.3221407   |

|    |   |             |             |             |
|----|---|-------------|-------------|-------------|
| O  | Y | 4.14166443  | 2.00923425  | -1.64948624 |
| H  | Y | 3.83698812  | 4.24410954  | -2.67062225 |
| H  | Y | 6.26699869  | 2.33299077  | -0.42169885 |
| O  | Y | 2.33246753  | 2.46505917  | -3.50165081 |
| Si | Y | 3.11647452  | 3.09742839  | -2.2458615  |
| Si | Y | 5.08140669  | 1.55199829  | -0.42600713 |
| O  | N | 0.09971126  | 4.26530763  | 0.67898206  |
| H  | Y | -3.81518242 | 4.29692816  | -2.42410969 |
| H  | Y | -0.81761429 | 6.65542972  | 0.35126662  |
| O  | N | 2.06370024  | 3.49435729  | -1.09318275 |
| H  | Y | -1.84910778 | 5.1012945   | 1.73051037  |
| Al | N | 0.94474648  | 2.9201839   | 0.06385808  |
| Si | Y | -1.15939967 | 5.28562628  | 0.50349914  |
| O  | Y | 5.46796142  | -0.00008637 | -0.59846492 |
| O  | N | 3.24273918  | -2.26555687 | 3.42919496  |
| O  | N | 4.33162293  | -1.95115203 | 0.98857863  |
| Si | N | 3.1102897   | -1.56558141 | 1.97736212  |
| O  | Y | 4.03602589  | 0.00020144  | 4.96026169  |
| O  | N | 3.24318938  | 2.26596966  | 3.42885979  |
| H  | Y | 4.64269909  | -2.35812501 | 5.40889016  |
| H  | Y | 4.64354027  | 2.35889088  | 5.40680012  |
| O  | N | 4.33286587  | 1.95111559  | 0.98870666  |
| H  | Y | 2.42491625  | -1.73561078 | 5.6900006   |
| H  | Y | 2.42538171  | 1.73740142  | 5.68917386  |
| Si | N | 3.11111482  | 1.56585638  | 1.97710364  |
| Si | Y | 3.59270897  | -1.54593665 | 4.90484147  |
| Si | Y | 3.59345449  | 1.54707435  | 4.90487576  |
| O  | Y | 1.58614901  | -0.00103234 | -4.014346   |
| H  | Y | 0.86992122  | -1.91231743 | -5.41578259 |
| H  | Y | 0.8702113   | 1.9106962   | -5.41604299 |
| Si | Y | 1.1427779   | -1.54618426 | -4.07120145 |
| Si | Y | 1.14281952  | 1.54484465  | -4.07184476 |
| O  | Y | 4.14107955  | -2.01078895 | -1.64981393 |
| H  | Y | 6.26670976  | -2.33402304 | -0.42035806 |
| H  | Y | 3.83564198  | -4.24592113 | -2.66968921 |
| O  | Y | 2.33287438  | -2.46795453 | -3.50021219 |
| Si | Y | 5.08069599  | -1.55301136 | -0.42604104 |
| Si | Y | 3.11507257  | -3.09859301 | -2.24452489 |
| O  | N | 0.0984241   | -4.26536378 | 0.68228785  |
| H  | Y | -0.81885808 | -6.6546178  | 0.35358918  |
| O  | N | 2.06265166  | -3.49417041 | -1.09093424 |
| H  | Y | -1.8510646  | -5.09974246 | 1.73290616  |
| Al | N | 0.94310497  | -2.9205198  | 0.0657613   |

|    |   |             |             |             |
|----|---|-------------|-------------|-------------|
| Si | Y | -1.16114676 | -5.28541994 | 0.50534586  |
| O  | Y | -2.09901942 | 4.82783747  | -0.72027317 |
| H  | Y | -4.54664011 | 4.29661639  | 2.06719894  |
| H  | Y | -6.14287562 | 4.69904133  | 0.43413274  |
| O  | Y | -2.09610832 | -4.82619466 | -0.72184799 |
| H  | Y | -8.22785097 | 1.9557549   | 0.35575404  |
| H  | Y | -3.8134613  | -4.29609679 | -2.42468826 |
| H  | Y | -8.0883219  | 1.73589162  | 2.66234083  |
| H  | Y | -4.54431648 | -4.29740709 | 2.06449057  |
| H  | Y | -8.22726273 | -1.9572567  | 0.35531552  |
| H  | Y | -6.14135111 | -4.69998669 | 0.43180572  |
| H  | Y | -8.08742606 | -1.73811782 | 2.6616992   |

**Table S10 – Coordinates for DFT Model of  $\alpha$ -Fe(II) (CHA)**

| element | constrained during optimization? | X           | Y           | Z           |
|---------|----------------------------------|-------------|-------------|-------------|
| Fe      | N                                | 0.64406224  | 0.00033164  | 0.57190717  |
| O       | N                                | -0.1741793  | 1.54244769  | -0.49332666 |
| O       | N                                | 1.5833205   | 1.7365958   | 1.25685225  |
| O       | N                                | 1.58211543  | -1.73628717 | 1.25798601  |
| O       | N                                | -0.17558635 | -1.54210711 | -0.491994   |
| O       | N                                | -1.82055954 | 0.00076919  | -1.86089377 |
| O       | N                                | -2.44211283 | 2.43854763  | -1.73589861 |
| O       | N                                | -2.44294202 | -2.43622434 | -1.73739881 |
| O       | Y                                | -4.25891576 | 3.31370039  | -0.05283248 |
| O       | Y                                | -6.10765882 | 2.43867248  | 1.5939389   |
| O       | Y                                | -4.25788521 | -3.31308683 | -0.05428291 |
| O       | Y                                | -7.06761418 | 0.00020727  | 1.4289581   |
| O       | Y                                | -6.10686145 | -2.43934992 | 1.59303196  |
| Si      | N                                | -1.17906326 | 1.47741305  | -1.81405041 |
| Si      | N                                | -1.17921507 | -1.47590045 | -1.81353535 |
| Si      | Y                                | -5.29777071 | 3.73960074  | 1.09972273  |
| Si      | Y                                | -3.2179759  | -3.73888301 | -1.20717828 |
| Si      | Y                                | -7.4521883  | 1.55129565  | 1.60796747  |
| Si      | Y                                | -5.29703992 | -3.73945335 | 1.09763089  |
| Si      | Y                                | -7.4515391  | -1.552713   | 1.60776216  |
| Si      | Y                                | -3.21956249 | 3.74020812  | -1.20592878 |
| O       | N                                | -0.34595561 | 1.81704696  | -3.15185385 |
| O       | N                                | -0.34559619 | -1.81708101 | -3.15057835 |
| O       | N                                | 3.06160646  | 0.00000761  | 2.33298365  |

|    |   |             |             |             |
|----|---|-------------|-------------|-------------|
| O  | Y | 4.04057187  | 2.00922092  | -1.64816452 |
| H  | Y | 3.72074716  | 4.24416724  | -2.6645497  |
| H  | Y | 6.18399063  | 2.33296942  | -0.45224735 |
| O  | Y | 2.20393909  | 2.4651931   | -3.47308869 |
| Si | Y | 3.00661261  | 3.09749241  | -2.22910073 |
| Si | Y | 4.99853158  | 1.55201814  | -0.43879751 |
| O  | N | 0.04917566  | 4.29158107  | 0.75605052  |
| H  | Y | -3.92693426 | 4.29713982  | -2.30382574 |
| H  | Y | -0.88820594 | 6.65545681  | 0.42656573  |
| O  | N | 1.9768986   | 3.50044893  | -1.0598991  |
| H  | Y | -1.89903472 | 5.1012751   | 1.82097761  |
| Al | N | 0.86144738  | 2.95032763  | 0.10852293  |
| Si | Y | -1.22766356 | 5.28561286  | 0.58388588  |
| O  | Y | 5.38242801  | -0.00011681 | -0.61714707 |
| O  | N | 3.22388779  | -2.26723277 | 3.44535878  |
| O  | N | 4.26944492  | -1.92135877 | 0.99410986  |
| Si | N | 3.05124339  | -1.57434908 | 1.9975059   |
| O  | Y | 4.03364769  | -0.0000048  | 4.96230672  |
| O  | N | 3.22424626  | 2.26734017  | 3.44509671  |
| H  | Y | 4.64679844  | -2.35838428 | 5.40182903  |
| H  | Y | 4.64768074  | 2.35869081  | 5.39989145  |
| O  | N | 4.27079749  | 1.92105162  | 0.99441378  |
| H  | Y | 2.43349366  | -1.73577045 | 5.71601527  |
| H  | Y | 2.43399753  | 1.73715338  | 5.7152985   |
| Si | N | 3.05202538  | 1.57433414  | 1.99725408  |
| Si | Y | 3.58939779  | -1.54621417 | 4.9135192   |
| Si | Y | 3.59017997  | 1.54701222  | 4.91359842  |
| O  | Y | 1.45002969  | -0.0008941  | -3.97465119 |
| H  | Y | 0.71296019  | -1.91210126 | -5.36534501 |
| H  | Y | 0.71329482  | 1.91089582  | -5.3654736  |
| Si | Y | 1.00576646  | -1.5460708  | -4.02501555 |
| Si | Y | 1.00594547  | 1.54506331  | -4.02557401 |
| O  | Y | 4.03990549  | -2.01072906 | -1.64860179 |
| H  | Y | 6.18364375  | -2.33411062 | -0.45105658 |
| H  | Y | 3.71927552  | -4.24586527 | -2.66386872 |
| O  | Y | 2.2043244   | -2.46781921 | -3.47183123 |
| Si | Y | 4.99773177  | -1.55311287 | -0.4389192  |
| Si | Y | 3.00513203  | -3.09849458 | -2.22791028 |
| O  | N | 0.04772027  | -4.2916266  | 0.7590511   |
| H  | Y | -0.8896193  | -6.65458944 | 0.42843848  |
| O  | N | 1.97559335  | -3.49999323 | -1.05792076 |
| H  | Y | -1.90112295 | -5.09975803 | 1.8230454   |
| Al | N | 0.85964675  | -2.95058105 | 0.11034779  |

|    |   |             |             |             |
|----|---|-------------|-------------|-------------|
| Si | Y | -1.22959475 | -5.28536285 | 0.58533141  |
| O  | Y | -2.18545062 | 4.82786775  | -0.62580867 |
| H  | Y | -4.591252   | 4.29660756  | 2.19787181  |
| H  | Y | -6.2116639  | 4.69915972  | 0.58881468  |
| O  | Y | -2.18273224 | -4.82611979 | -0.62781563 |
| H  | Y | -8.29763156 | 1.95589007  | 0.54145779  |
| H  | Y | -3.92533381 | -4.29593019 | -2.30475856 |
| H  | Y | -8.12370042 | 1.73594482  | 2.84569772  |
| H  | Y | -4.58910102 | -4.29737421 | 2.19482383  |
| H  | Y | -8.297109   | -1.95712064 | 0.54087571  |
| H  | Y | -6.21031968 | -4.69989681 | 0.58613888  |
| H  | Y | -8.1228668  | -1.73806457 | 2.84492296  |

**Table S11 – Coordinates for DFT Model of  $\alpha$ -O (CHA)**

| <b>element</b> | <b>constrained during optimization?</b> | <b>X</b>    | <b>Y</b>    | <b>Z</b>    |
|----------------|-----------------------------------------|-------------|-------------|-------------|
| Fe             | N                                       | 0.43069028  | 0.00031886  | 0.72569816  |
| O              | N                                       | -0.13936506 | 1.49426365  | -0.53051914 |
| O              | N                                       | 1.60373886  | 1.6709757   | 1.20775213  |
| O              | N                                       | 1.60240342  | -1.67046946 | 1.20888027  |
| O              | N                                       | -0.14055575 | -1.49399071 | -0.52934538 |
| O              | N                                       | -0.6598037  | 0.00118572  | 1.87604154  |
| O              | N                                       | -1.82178329 | 0.00074995  | -1.91635687 |
| O              | N                                       | -2.40530669 | 2.44332665  | -1.76025299 |
| O              | N                                       | -2.40654389 | -2.44049535 | -1.7606462  |
| O              | Y                                       | -4.24212824 | 3.31364969  | -0.09477907 |
| O              | Y                                       | -6.09492253 | 2.43865857  | 1.54744319  |
| O              | Y                                       | -4.24105294 | -3.31313233 | -0.09603779 |
| O              | Y                                       | -7.05417896 | -0.00015129 | 1.38019583  |
| O              | Y                                       | -6.09410797 | -2.4390012  | 1.54692632  |
| Si             | N                                       | -1.16003798 | 1.46593573  | -1.85044767 |
| Si             | N                                       | -1.1601781  | -1.46449959 | -1.84995349 |
| Si             | Y                                       | -5.28380669 | 3.73957633  | 1.05521532  |
| Si             | Y                                       | -3.19829467 | -3.73894927 | -1.24638447 |
| Si             | Y                                       | -7.43943724 | 1.55127913  | 1.55823456  |
| Si             | Y                                       | -5.2830515  | -3.73947306 | 1.05329095  |
| Si             | Y                                       | -7.43893225 | -1.55274738 | 1.55794652  |
| Si             | Y                                       | -3.19989665 | 3.74015868  | -1.24536022 |
| O              | N                                       | -0.31767842 | 1.81735801  | -3.17732608 |
| O              | N                                       | -0.31745724 | -1.81802411 | -3.17602851 |

|    |   |             |             |             |
|----|---|-------------|-------------|-------------|
| O  | N | 3.17537792  | 0.00011283  | 2.31436653  |
| O  | Y | 4.06131253  | 2.00917673  | -1.66948803 |
| H  | Y | 3.74399434  | 4.24408046  | -2.68672864 |
| H  | Y | 6.20176151  | 2.33294504  | -0.46828316 |
| O  | Y | 2.22921788  | 2.46505909  | -3.49897936 |
| Si | Y | 3.02874439  | 3.09740264  | -2.2529818  |
| Si | Y | 5.0162315   | 1.55201948  | -0.4577567  |
| O  | N | 0.0500761   | 4.26278177  | 0.71374154  |
| H  | Y | -3.90455485 | 4.29704353  | -2.34494818 |
| H  | Y | -0.87261314 | 6.65543199  | 0.39288027  |
| O  | N | 1.99169668  | 3.48626302  | -1.08306239 |
| H  | Y | -1.8868873  | 5.10129862  | 1.78483981  |
| Al | N | 0.88080233  | 2.92167817  | 0.08283123  |
| Si | Y | -1.21255552 | 5.2856853   | 0.5493707   |
| O  | Y | 5.40061351  | -0.00014354 | -0.63510668 |
| O  | N | 3.21470574  | -2.26463463 | 3.41918341  |
| O  | N | 4.27659146  | -1.95552058 | 0.96279915  |
| Si | N | 3.07530149  | -1.56316318 | 1.97067217  |
| O  | Y | 4.03804343  | 0.00011604  | 4.94097824  |
| O  | N | 3.21512233  | 2.26498882  | 3.41891261  |
| H  | Y | 4.65009486  | -2.35824801 | 5.38209029  |
| H  | Y | 4.65096755  | 2.35881196  | 5.38002761  |
| O  | N | 4.27801746  | 1.95531642  | 0.96303523  |
| H  | Y | 2.43601659  | -1.73564611 | 5.69078182  |
| H  | Y | 2.43651637  | 1.7372912   | 5.68998594  |
| Si | N | 3.07618905  | 1.56339895  | 1.97045485  |
| Si | Y | 3.59389473  | -1.54609549 | 4.89115305  |
| Si | Y | 3.59467998  | 1.54707782  | 4.8912114   |
| O  | Y | 1.47654726  | -0.00102546 | -4.00230897 |
| H  | Y | 0.74293639  | -1.91227049 | -5.39480732 |
| H  | Y | 0.74325444  | 1.91071775  | -5.39503773 |
| Si | Y | 1.03240811  | -1.54622184 | -4.05380105 |
| Si | Y | 1.03259938  | 1.54490917  | -4.05445237 |
| O  | Y | 4.06066809  | -2.01079272 | -1.66983524 |
| H  | Y | 6.20143199  | -2.33412153 | -0.46697489 |
| H  | Y | 3.74256234  | -4.24594378 | -2.68583889 |
| O  | Y | 2.22960569  | -2.46793012 | -3.49758602 |
| Si | Y | 5.01547763  | -1.55314182 | -0.45781499 |
| Si | Y | 3.0273083   | -3.09860802 | -2.25168097 |
| O  | N | 0.04889539  | -4.26297057 | 0.71672264  |
| H  | Y | -0.87398071 | -6.65461462 | 0.39511822  |
| O  | N | 1.9905508   | -3.48596408 | -1.08088935 |
| H  | Y | -1.88893248 | -5.09974758 | 1.78717579  |



|    |   |             |             |             |
|----|---|-------------|-------------|-------------|
| Al | N | 0.87908462  | -2.92188439 | 0.08470401  |
| Si | Y | -1.21434559 | -5.2854378  | 0.55111969  |
| O  | Y | -2.16725299 | 4.82782146  | -0.66262729 |
| H  | Y | -4.58002337 | 4.29661521  | 2.1550853   |
| H  | Y | -6.19644624 | 4.6991181   | 0.54201001  |
| O  | Y | -2.16449843 | -4.8261883  | -0.66436555 |
| H  | Y | -8.28224859 | 1.95584834  | 0.48953983  |
| H  | Y | -3.90292949 | -4.29604772 | -2.34564158 |
| H  | Y | -8.11408236 | 1.73595032  | 2.79421543  |
| H  | Y | -4.57783815 | -4.29737352 | 2.15227522  |
| H  | Y | -8.28172147 | -1.95716435 | 0.4890667   |
| H  | Y | -6.19505371 | -4.69992237 | 0.53955113  |
| H  | Y | -8.11326769 | -1.73810005 | 2.79350853  |

**Table S12 – Coordinates for DFT Model of  $\alpha$ -OH (CHA)**

| <b>element</b> | <b>constrained during optimization?</b> | <b>X</b>    | <b>Y</b>    | <b>Z</b>    |
|----------------|-----------------------------------------|-------------|-------------|-------------|
| Fe             | N                                       | 0.37108239  | -0.00136969 | 0.78271673  |
| O              | N                                       | -0.1451366  | 1.49590057  | -0.5267685  |
| O              | N                                       | 1.60550984  | 1.68319114  | 1.21096759  |
| O              | N                                       | 1.59896882  | -1.67209074 | 1.21752678  |
| O              | N                                       | -0.13953104 | -1.50258828 | -0.5339549  |
| O              | N                                       | -0.85245754 | 0.00673157  | 2.05031402  |
| H              | N                                       | -1.68753407 | 0.4239811   | 2.27662958  |
| O              | N                                       | -1.80965153 | -0.00407613 | -1.92283604 |
| O              | N                                       | -2.39679947 | 2.43482158  | -1.76966602 |
| O              | N                                       | -2.39973166 | -2.44142114 | -1.77416873 |
| O              | Y                                       | -4.23316298 | 3.31256021  | -0.11719167 |
| O              | Y                                       | -6.08900955 | 2.43985486  | 1.52261509  |
| O              | Y                                       | -4.2318172  | -3.3140232  | -0.10901817 |
| O              | Y                                       | -7.04835097 | 0.00117932  | 1.35702122  |
| O              | Y                                       | -6.08791643 | -2.43798803 | 1.52896034  |
| Si             | N                                       | -1.14446634 | 1.4606543   | -1.85924787 |
| Si             | N                                       | -1.14470447 | -1.47125831 | -1.85739416 |
| Si             | Y                                       | -5.2772334  | 3.74023119  | 1.02994616  |
| Si             | Y                                       | -3.18678772 | -3.7415049  | -1.25665747 |
| Si             | Y                                       | -7.43364455 | 1.5525947   | 1.53199289  |
| Si             | Y                                       | -5.27581895 | -3.73889067 | 1.03921367  |
| Si             | Y                                       | -7.43271452 | -1.55159569 | 1.53650669  |
| Si             | Y                                       | -3.18878097 | 3.7373718   | -1.26645921 |

|    |   |             |             |             |
|----|---|-------------|-------------|-------------|
| O  | N | -0.30227872 | 1.8113666   | -3.18649742 |
| O  | N | -0.30687104 | -1.81924996 | -3.18897912 |
| O  | N | 3.17564456  | 0.00462808  | 2.31289952  |
| O  | Y | 4.07327558  | 2.00638631  | -1.67422905 |
| H  | Y | 3.75778388  | 4.23979264  | -2.69538526 |
| H  | Y | 6.21145339  | 2.33204404  | -0.46939892 |
| O  | Y | 2.24468268  | 2.45947339  | -3.50792981 |
| Si | Y | 3.04191143  | 3.09371058  | -2.26142128 |
| Si | Y | 5.02597735  | 1.55101325  | -0.460054   |
| O  | N | 0.05016614  | 4.2556444   | 0.69944347  |
| H  | Y | -3.89131494 | 4.29277715  | -2.36834982 |
| H  | Y | -0.86484284 | 6.6553587   | 0.37183142  |
| O  | N | 1.99802742  | 3.48562136  | -1.09766966 |
| H  | Y | -1.88167093 | 5.10320931  | 1.76413874  |
| Al | N | 0.8926704   | 2.91509517  | 0.07169203  |
| Si | Y | -1.20487568 | 5.28570626  | 0.52965024  |
| O  | Y | 5.41068153  | -0.00132255 | -0.6343889  |
| O  | N | 3.22163368  | -2.25868    | 3.41880993  |
| O  | N | 4.27980869  | -1.95044263 | 0.96274697  |
| Si | N | 3.07397369  | -1.55943076 | 1.96792236  |
| O  | Y | 4.03739963  | 0.0070397   | 4.9392173   |
| O  | N | 3.22157568  | 2.27074245  | 3.41298265  |
| H  | Y | 4.64889818  | -2.35061252 | 5.38482572  |
| H  | Y | 4.6494808   | 2.36640271  | 5.37583701  |
| O  | N | 4.28470296  | 1.95532537  | 0.95834876  |
| H  | Y | 2.4341667   | -1.7277631  | 5.68836523  |
| H  | Y | 2.43445089  | 1.74524416  | 5.68246379  |
| Si | N | 3.07780423  | 1.56739243  | 1.96343859  |
| Si | Y | 3.59364454  | -1.53919442 | 4.89065437  |
| Si | Y | 3.59423579  | 1.55380967  | 4.88616878  |
| O  | Y | 1.49313847  | -0.007389   | -4.00917242 |
| H  | Y | 0.76224085  | -1.92074291 | -5.40014106 |
| H  | Y | 0.76236906  | 1.90226747  | -5.40599085 |
| Si | Y | 1.04928967  | -1.55259056 | -4.05897762 |
| Si | Y | 1.04916619  | 1.53834997  | -4.06413262 |
| O  | Y | 4.07290993  | -2.01358756 | -1.66869602 |
| H  | Y | 6.2114137   | -2.33497251 | -0.46123849 |
| H  | Y | 3.75688059  | -4.25023576 | -2.6820467  |
| O  | Y | 2.2453266   | -2.47358962 | -3.49929891 |
| Si | Y | 5.02542138  | -1.55401462 | -0.45554881 |
| Si | Y | 3.04082462  | -3.10230439 | -2.25101869 |
| O  | N | 0.05744847  | -4.26454685 | 0.70875652  |
| H  | Y | -0.86538835 | -6.65467246 | 0.39360064  |

|    |   |             |             |             |
|----|---|-------------|-------------|-------------|
| O  | N | 2.0017943   | -3.48684483 | -1.08141634 |
| H  | Y | -1.88308587 | -5.09781865 | 1.78145987  |
| Al | N | 0.88800745  | -2.91720668 | 0.08201174  |
| Si | Y | -1.20608343 | -5.285223   | 0.54695913  |
| O  | Y | -2.15736912 | 4.82615035  | -0.68344626 |
| H  | Y | -4.57546293 | 4.29888513  | 2.13042127  |
| H  | Y | -6.18881667 | 4.69891497  | 0.5136357   |
| O  | Y | -2.15400467 | -4.82787244 | -0.67094649 |
| H  | Y | -8.27439576 | 1.95542022  | 0.46125454  |
| H  | Y | -3.88920432 | -4.3004099  | -2.35636383 |
| H  | Y | -8.11050655 | 1.73893235  | 2.76658767  |
| H  | Y | -4.57273461 | -4.29501994 | 2.14025755  |
| H  | Y | -8.27362877 | -1.95755013 | 0.46653259  |
| H  | Y | -6.18683347 | -4.70013763 | 0.52502926  |
| H  | Y | -8.10946788 | -1.73504266 | 2.7709989   |

**Table S13 – Coordinates for DFT Model of  $\alpha$ -OCH<sub>3</sub> (CHA)**

| <b>element</b> | <b>constrained during optimization?</b> | <b>X</b>    | <b>Y</b>    | <b>Z</b>    |
|----------------|-----------------------------------------|-------------|-------------|-------------|
| Fe             | N                                       | -0.39157967 | -0.0003875  | 0.75576297  |
| O              | N                                       | 0.09947851  | -1.5110778  | -0.5677878  |
| O              | N                                       | -1.61634215 | -1.69106569 | 1.21642237  |
| O              | N                                       | -1.61517574 | 1.6903601   | 1.21769784  |
| O              | N                                       | 0.10075862  | 1.51116116  | -0.56634329 |
| O              | N                                       | 0.94520129  | -0.0014753  | 1.89644267  |
| C              | N                                       | 2.33594573  | -0.00419693 | 2.09969198  |
| H              | N                                       | 2.78384044  | -0.89340365 | 1.64419161  |
| H              | N                                       | 2.78602544  | 0.88769297  | 1.65164778  |
| H              | N                                       | 2.53954111  | -0.00893839 | 3.17376884  |
| O              | N                                       | 1.74963488  | -0.00044584 | -1.96505294 |
| O              | N                                       | 2.35123354  | -2.4359787  | -1.82069557 |
| O              | N                                       | 2.35199852  | 2.43429448  | -1.82172653 |
| O              | Y                                       | 4.19614853  | -3.31345979 | -0.17773241 |
| O              | Y                                       | 6.06746241  | -2.43854465 | 1.44340497  |
| O              | Y                                       | 4.19489531  | 3.31332604  | -0.17847148 |
| O              | Y                                       | 7.02497059  | -0.00003192 | 1.26541803  |
| O              | Y                                       | 6.06650571  | 2.43947779  | 1.44302098  |
| Si             | N                                       | 1.08998464  | -1.46970346 | -1.89974815 |
| Si             | N                                       | 1.09010923  | 1.46883043  | -1.89900081 |
| Si             | Y                                       | 5.25085583  | -3.73944682 | 0.96030104  |

|    |   |             |             |             |
|----|---|-------------|-------------|-------------|
| Si | Y | 3.13914275  | 3.73919333  | -1.31682263 |
| Si | Y | 7.41203057  | -1.55112686 | 1.43892822  |
| Si | Y | 5.24986663  | 3.73960742  | 0.95900827  |
| Si | Y | 7.41128512  | 1.55288178  | 1.4390576   |
| Si | Y | 3.14094508  | -3.73990437 | -1.31641232 |
| O  | N | 0.24503359  | -1.81806302 | -3.22674805 |
| O  | N | 0.24473046  | 1.81886671  | -3.22525606 |
| O  | N | -3.16277284 | -0.00032706 | 2.32506694  |
| O  | Y | -4.12468104 | -2.0090964  | -1.65798    |
| H  | Y | -3.8188483  | -4.24390658 | -2.67892157 |
| H  | Y | -6.25132907 | -2.33299658 | -0.4325227  |
| O  | Y | -2.31343359 | -2.46478932 | -3.50818121 |
| Si | Y | -3.09878881 | -3.09726109 | -2.25325323 |
| Si | Y | -5.06573322 | -1.55202208 | -0.43545763 |
| O  | N | -0.08456613 | -4.26432298 | 0.6768569   |
| H  | Y | 3.83308265  | -4.2966777  | -2.42402107 |
| H  | Y | 0.83249554  | -6.65537204 | 0.3478833   |
| O  | N | -2.04947209 | -3.48934168 | -1.09536325 |
| H  | Y | 1.86246355  | -5.10131653 | 1.72835561  |
| Al | N | -0.92635005 | -2.91868596 | 0.05880871  |
| Si | Y | 1.17413042  | -5.28562889 | 0.50059915  |
| O  | Y | -5.45216056 | 0.00011334  | -0.60820649 |
| O  | N | -3.22956227 | 2.26580714  | 3.42227758  |
| O  | N | -4.3030539  | 1.94177438  | 0.9761366   |
| Si | N | -3.08409964 | 1.56390408  | 1.97139573  |
| O  | Y | -4.02633868 | -0.00054451 | 4.95202876  |
| O  | N | -3.22991189 | -2.26676285 | 3.4216664   |
| H  | Y | -4.63344743 | 2.35777079  | 5.40017921  |
| H  | Y | -4.63422117 | -2.35929041 | 5.3977542   |
| O  | N | -4.30425748 | -1.94193527 | 0.97602388  |
| H  | Y | -2.41597842 | 1.73522149  | 5.6836502   |
| H  | Y | -2.41639605 | -1.73774848 | 5.68258889  |
| Si | N | -3.08487338 | -1.564499   | 1.97095617  |
| Si | Y | -3.58293668 | 1.54560596  | 4.89719398  |
| Si | Y | -3.58363651 | -1.54740451 | 4.89703341  |
| O  | Y | -1.56660499 | 0.0013647   | -4.01985207 |
| H  | Y | -0.84889654 | 1.9127397   | -5.42041707 |
| H  | Y | -0.84911244 | -1.91025088 | -5.42094206 |
| Si | Y | -1.1231067  | 1.54657736  | -4.07620059 |
| Si | Y | -1.12322979 | -1.54454474 | -4.0770828  |
| O  | Y | -4.1241428  | 2.01088727  | -1.6580169  |
| H  | Y | -6.25110919 | 2.33404061  | -0.43085277 |
| H  | Y | -3.81763185 | 4.24611893  | -2.67738473 |

|    |   |             |             |             |
|----|---|-------------|-------------|-------------|
| O  | Y | -2.31393687 | 2.46821225  | -3.50639308 |
| Si | Y | -5.06506726 | 1.55308285  | -0.43528666 |
| Si | Y | -3.09750582 | 3.09879499  | -2.25149456 |
| O  | N | -0.08344757 | 4.26437308  | 0.68081576  |
| H  | Y | 0.83354104  | 6.65467781  | 0.35114515  |
| O  | N | -2.04841058 | 3.48927507  | -1.09272723 |
| H  | Y | 1.86426802  | 5.09972466  | 1.73146489  |
| Al | N | -0.92472537 | 2.91904748  | 0.06108231  |
| Si | Y | 1.17565545  | 5.28549073  | 0.50316538  |
| O  | Y | 2.11501817  | -4.82764453 | -0.72211862 |
| H  | Y | 4.55961002  | -4.29659069 | 2.06805959  |
| H  | Y | 6.15762305  | -4.69892356 | 0.43670116  |
| O  | Y | 2.11197689  | 4.8263639   | -0.72308104 |
| H  | Y | 8.24265354  | -1.95558314 | 0.36078422  |
| H  | Y | 3.83122436  | 4.29639473  | -2.4240245  |
| H  | Y | 8.10060389  | -1.73588418 | 2.66723255  |
| H  | Y | 4.5571583   | 4.29739128  | 2.0659434   |
| H  | Y | 8.24200519  | 1.9574276   | 0.36062     |
| H  | Y | 6.15595894  | 4.70013315  | 0.43503042  |
| H  | Y | 8.09965503  | 1.73812525  | 2.66683391  |

**Table S14 – Coordinates for DFT Model of C-O Recombination TS (CHA)**

| element | constrained during optimization? | X           | Y           | Z           |
|---------|----------------------------------|-------------|-------------|-------------|
| Fe      | N                                | 0.43565724  | -0.00320197 | 0.76391618  |
| O       | N                                | -0.08792594 | 1.51364167  | -0.55221599 |
| O       | N                                | 1.64433117  | 1.71136807  | 1.20969844  |
| O       | N                                | 1.64308036  | -1.69431003 | 1.20980373  |
| O       | N                                | -0.0904309  | -1.52586141 | -0.55274544 |
| O       | N                                | -0.79950884 | 0.00616413  | 2.03935795  |
| H       | N                                | -1.43131338 | 0.62815474  | 2.41497695  |
| C       | N                                | -3.4693545  | 0.01551726  | 1.40781789  |
| H       | N                                | -3.53364874 | 0.93770336  | 0.84802883  |
| H       | N                                | -3.31298448 | -0.91419027 | 0.88328304  |
| H       | N                                | -3.81846821 | -0.01375737 | 2.43116477  |
| O       | N                                | -1.72983373 | -0.00588261 | -1.95690732 |
| O       | N                                | -2.33759234 | 2.42797791  | -1.81176791 |
| O       | N                                | -2.34287733 | -2.4368044  | -1.81439792 |
| O       | Y                                | -4.18356632 | 3.31146662  | -0.18045778 |
| O       | Y                                | -6.05477374 | 2.43949421  | 1.44239032  |

|    |   |             |             |             |
|----|---|-------------|-------------|-------------|
| O  | Y | -4.18120077 | -3.31529555 | -0.16787733 |
| O  | Y | -7.01187123 | 0.00046932  | 1.26928913  |
| O  | Y | -6.05300179 | -2.43851824 | 1.45181352  |
| Si | N | -1.07230425 | 1.46293424  | -1.88892608 |
| Si | N | -1.07376498 | -1.47777861 | -1.88518612 |
| Si | Y | -5.23838667 | 3.73955945  | 0.95667608  |
| Si | Y | -3.12535555 | -3.74326559 | -1.30535084 |
| Si | Y | -7.39919337 | 1.55184475  | 1.43967318  |
| Si | Y | -5.2361435  | -3.73948167 | 0.97042397  |
| Si | Y | -7.39792927 | -1.55215673 | 1.44604275  |
| Si | Y | -3.12839453 | 3.73577736  | -1.31996863 |
| O  | N | -0.22696936 | 1.81258038  | -3.21645174 |
| O  | N | -0.23010841 | -1.82519059 | -3.21493894 |
| O  | N | 3.16951652  | 0.00714733  | 2.32349412  |
| O  | Y | 4.13748644  | 2.00552964  | -1.65792968 |
| H  | Y | 3.83130168  | 4.2382231   | -2.68337618 |
| H  | Y | 6.26407467  | 2.3322238   | -0.4330929  |
| O  | Y | 2.32621054  | 2.45718591  | -3.50909056 |
| Si | Y | 3.11142242  | 3.09227573  | -2.2554194  |
| Si | Y | 5.07860144  | 1.55101419  | -0.43448551 |
| O  | N | 0.09429443  | 4.26354975  | 0.67875462  |
| H  | Y | -3.82062721 | 4.29021418  | -2.42873172 |
| H  | Y | -0.82049055 | 6.65498515  | 0.33848544  |
| O  | N | 2.05962301  | 3.49701188  | -1.10432796 |
| H  | Y | -1.85022245 | 5.10353882  | 1.72206329  |
| Al | N | 0.94309471  | 2.92466139  | 0.05369736  |
| Si | Y | -1.16191407 | 5.28548529  | 0.49393581  |
| O  | Y | 5.465266    | -0.00135669 | -0.60417041 |
| O  | N | 3.24492842  | -2.25683625 | 3.43018871  |
| O  | N | 4.32722841  | -1.9372267  | 0.98952852  |
| Si | N | 3.10206192  | -1.56011566 | 1.97722832  |
| O  | Y | 4.03930905  | 0.01023947  | 4.9560954   |
| O  | N | 3.24405841  | 2.27493435  | 3.42260381  |
| H  | Y | 4.64688885  | -2.34704051 | 5.40898292  |
| H  | Y | 4.64686793  | 2.36996089  | 5.39707331  |
| O  | N | 4.3285036   | 1.94515702  | 0.98117492  |
| H  | Y | 2.42929617  | -1.72434506 | 5.69117669  |
| H  | Y | 2.42912836  | 1.74866241  | 5.68312637  |
| Si | N | 3.10439592  | 1.5724478   | 1.97177581  |
| Si | Y | 3.5962138   | -1.53608839 | 4.90437996  |
| Si | Y | 3.5963863   | 1.5569062   | 4.8979766   |
| O  | Y | 1.57979829  | -0.01011692 | -4.01582209 |
| H  | Y | 0.86243068  | -1.92443007 | -5.4125436  |

|    |   |             |             |             |
|----|---|-------------|-------------|-------------|
| H  | Y | 0.86200647  | 1.89856125  | -5.42075436 |
| Si | Y | 1.13655215  | -1.555497   | -4.0690478  |
| Si | Y | 1.13617005  | 1.5355727   | -4.07614446 |
| O  | Y | 4.13762943  | -2.0144826  | -1.64988627 |
| H  | Y | 6.26463719  | -2.33477614 | -0.42204633 |
| H  | Y | 3.83150735  | -4.25178771 | -2.66478136 |
| O  | Y | 2.327539    | -2.47579904 | -3.49738556 |
| Si | Y | 5.07848332  | -1.55399367 | -0.42806672 |
| Si | Y | 3.11119942  | -3.10371881 | -2.24124171 |
| O  | N | 0.10612091  | -4.2768663  | 0.69189583  |
| H  | Y | -0.81931388 | -6.65502987 | 0.36850593  |
| O  | N | 2.06286453  | -3.49823504 | -1.08471023 |
| H  | Y | -1.85031582 | -5.09747253 | 1.7456843   |
| Al | N | 0.93819312  | -2.92830206 | 0.06884865  |
| Si | Y | -1.16165942 | -5.28558749 | 0.51774885  |
| O  | Y | -2.10268066 | 4.82488789  | -0.72786734 |
| H  | Y | -4.54724376 | 4.29904436  | 2.06333462  |
| H  | Y | -6.14529428 | 4.69782971  | 0.43114176  |
| O  | Y | -2.09804686 | -4.82909907 | -0.709408   |
| H  | Y | -8.22986433 | 1.9539942   | 0.36070349  |
| H  | Y | -3.81734455 | -4.30282688 | -2.41145138 |
| H  | Y | -8.08782051 | 1.73895637  | 2.66759105  |
| H  | Y | -4.54335543 | -4.29492361 | 2.07849601  |
| H  | Y | -8.22856234 | -1.95900878 | 0.36840591  |
| H  | Y | -6.14205947 | -4.70121001 | 0.44836827  |
| H  | Y | -8.08629113 | -1.73504699 | 2.67417724  |

**Table S15 – Coordinates for DFT Model of  $\alpha$ -MeOH (CHA)**

| <b>element</b> | <b>constrained during optimization?</b> | <b>X</b>    | <b>Y</b>    | <b>Z</b>    |
|----------------|-----------------------------------------|-------------|-------------|-------------|
| Fe             | N                                       | -0.49667952 | 0.03250597  | 0.65651902  |
| O              | N                                       | 0.09353453  | -1.51370229 | -0.61056201 |
| O              | N                                       | -1.59339729 | -1.88715759 | 1.24640659  |
| O              | N                                       | -1.58890051 | 1.75946508  | 1.24777801  |
| O              | N                                       | 0.14723964  | 1.62012919  | -0.54861354 |
| O              | N                                       | 0.51954987  | -0.56940842 | 2.3508367   |
| H              | N                                       | 0.18999296  | -1.42172011 | 2.66300371  |
| C              | N                                       | 1.90854677  | -0.36253709 | 2.69093041  |
| H              | N                                       | 2.54408865  | -1.06400162 | 2.14800576  |
| H              | N                                       | 2.15119483  | 0.65611169  | 2.39816213  |

|    |   |             |             |             |
|----|---|-------------|-------------|-------------|
| H  | N | 2.04473782  | -0.47316586 | 3.76686606  |
| O  | N | 1.73889873  | 0.05651086  | -1.94569605 |
| O  | N | 2.3608952   | -2.38152177 | -1.87714608 |
| O  | N | 2.39615066  | 2.48524307  | -1.8256888  |
| O  | Y | 4.21150022  | -3.29468697 | -0.26377078 |
| O  | Y | 6.08218179  | -2.45409008 | 1.37614615  |
| O  | Y | 4.20978814  | 3.33063902  | -0.12454975 |
| O  | Y | 7.03958245  | -0.01230287 | 1.2500415   |
| O  | Y | 6.08088414  | 2.42285197  | 1.47878947  |
| Si | N | 1.089499    | -1.41936196 | -1.93157416 |
| Si | N | 1.11158347  | 1.54249125  | -1.88378305 |
| Si | Y | 5.26583819  | -3.74455009 | 0.86538278  |
| Si | Y | 3.15440369  | 3.780386    | -1.25402093 |
| Si | Y | 7.42668942  | -1.56669192 | 1.39088947  |
| Si | Y | 5.26432647  | 3.73286327  | 1.0220537   |
| Si | Y | 7.42572695  | 1.53662131  | 1.45657721  |
| Si | Y | 3.15672677  | -3.69705271 | -1.41157623 |
| O  | N | 0.26265208  | -1.7316995  | -3.28199234 |
| O  | N | 0.26642805  | 1.89545612  | -3.21253624 |
| O  | N | -2.99392807 | -0.05806929 | 2.29400018  |
| O  | Y | -4.10886846 | -1.9598649  | -1.7190703  |
| H  | Y | -3.80254474 | -4.17259989 | -2.78689748 |
| H  | Y | -6.23594276 | -2.30972929 | -0.5015389  |
| O  | Y | -2.29696508 | -2.37626687 | -3.57785955 |
| Si | Y | -3.08271657 | -3.0351385  | -2.33684521 |
| Si | Y | -5.05046643 | -1.52880157 | -0.487492   |
| O  | N | -0.07163567 | -4.28435304 | 0.58401164  |
| H  | Y | 3.84929744  | -4.23026428 | -2.53045498 |
| H  | Y | 0.84789712  | -6.64716603 | 0.18995122  |
| O  | N | -2.03716239 | -3.48438253 | -1.20034107 |
| H  | Y | 1.87726824  | -5.1225487  | 1.60330227  |
| Al | N | -0.92118596 | -2.94309064 | -0.02875452 |
| Si | Y | 1.18937801  | -5.28092006 | 0.371682    |
| O  | Y | -5.43689464 | 0.02663846  | -0.62767843 |
| O  | N | -3.23159663 | 2.1887346   | 3.44720544  |
| O  | N | -4.28772097 | 1.8719938   | 1.00957354  |
| Si | N | -3.04192384 | 1.52335497  | 1.9836168   |
| O  | Y | -4.01304341 | -0.09136673 | 4.93187033  |
| O  | N | -3.25741854 | -2.33793306 | 3.36573874  |
| H  | Y | -4.62045494 | 2.25691578  | 5.42955744  |
| H  | Y | -4.62089623 | -2.45904042 | 5.32750767  |
| O  | N | -4.2979403  | -1.90748509 | 0.92758178  |
| H  | Y | -2.4030515  | 1.62863556  | 5.70060086  |



|    |   |             |             |             |
|----|---|-------------|-------------|-------------|
| H  | Y | -2.40322473 | -1.8434943  | 5.62618695  |
| Si | N | -3.0551116  | -1.62881502 | 1.9247309   |
| Si | Y | -3.56967515 | 1.45571249  | 4.90991735  |
| Si | Y | -3.57016841 | -1.63679214 | 4.84441691  |
| O  | Y | -1.55012598 | 0.1001865   | -4.03707121 |
| H  | Y | -0.83205514 | 2.04076112  | -5.39669405 |
| H  | Y | -0.83200527 | -1.78136627 | -5.47796324 |
| Si | Y | -1.10672211 | 1.64626795  | -4.06060586 |
| Si | Y | -1.10662731 | -1.44414405 | -4.12677709 |
| O  | Y | -4.10861244 | 2.05920938  | -1.63420261 |
| H  | Y | -6.23604844 | 2.3562664   | -0.40129725 |
| H  | Y | -3.80192249 | 4.3154997   | -2.60604426 |
| O  | Y | -2.29781245 | 2.55559056  | -3.47188606 |
| Si | Y | -5.05001638 | 1.57565187  | -0.42173455 |
| Si | Y | -3.08186234 | 3.15946265  | -2.20421844 |
| O  | N | -0.09204641 | 4.30718976  | 0.76981544  |
| H  | Y | 0.84800948  | 6.65984586  | 0.47432851  |
| O  | N | -2.04080813 | 3.55301797  | -1.04343385 |
| H  | Y | 1.87835899  | 5.07615283  | 1.82186557  |
| Al | N | -0.90819473 | 2.97623614  | 0.0965137   |
| Si | Y | 1.19017294  | 5.28776905  | 0.59752054  |
| O  | Y | 2.13066974  | -4.79716569 | -0.84075523 |
| H  | Y | 4.57423927  | -4.32500913 | 1.96088313  |
| H  | Y | 6.17285647  | -4.69269713 | 0.32195719  |
| O  | Y | 2.12694716  | 4.85470321  | -0.63782208 |
| H  | Y | 8.25772138  | -1.94823531 | 0.30473809  |
| H  | Y | 3.84683623  | 4.3608912   | -2.34896789 |
| H  | Y | 8.11484252  | -1.77730809 | 2.61526147  |
| H  | Y | 4.57118703  | 4.26710063  | 2.14027751  |
| H  | Y | 8.25679977  | 1.96390627  | 0.38721906  |
| H  | Y | 6.17053582  | 4.70429787  | 0.51880209  |
| H  | Y | 8.11365097  | 1.69593537  | 2.68823671  |

**Table S16 – Coordinates for DFT Model of CH<sub>3</sub> Radical Escape TS (CHA)**

| element | constrained during optimization? | X           | Y           | Z           |
|---------|----------------------------------|-------------|-------------|-------------|
| Fe      | N                                | -0.42325988 | -0.00001559 | 0.78301668  |
| O       | N                                | 0.07037008  | -1.49955078 | -0.53626773 |
| O       | N                                | -1.66192762 | -1.67371466 | 1.22678969  |
| O       | N                                | -1.66221319 | 1.67350103  | 1.22673924  |

|    |   |             |             |             |
|----|---|-------------|-------------|-------------|
| O  | N | 0.07005806  | 1.49909166  | -0.53660963 |
| O  | N | 0.8872166   | 0.00070105  | 1.96682918  |
| H  | N | 1.84940885  | 0.00087394  | 1.9371646   |
| C  | N | 4.38574851  | -0.04093813 | -0.46803989 |
| H  | N | 4.61381279  | -0.75214552 | 0.3066797   |
| H  | N | 4.16423679  | -0.38627711 | -1.46488546 |
| H  | N | 4.43038397  | 1.01579209  | -0.26634365 |
| O  | N | 1.69793385  | -0.00068867 | -1.98289992 |
| O  | N | 2.34357013  | -2.43048714 | -1.74548294 |
| O  | N | 2.343914    | 2.42826172  | -1.74114246 |
| O  | Y | 4.16960175  | -3.31115635 | -0.08555197 |
| O  | Y | 6.01957309  | -2.4344541  | 1.55976545  |
| O  | Y | 4.16541055  | 3.31611505  | -0.0880205  |
| O  | Y | 6.9780231   | 0.00432698  | 1.39347318  |
| O  | Y | 6.01617026  | 2.44343298  | 1.55785962  |
| Si | N | 1.07457348  | -1.47817856 | -1.86101801 |
| Si | N | 1.07463659  | 1.47662031  | -1.86149577 |
| Si | Y | 5.20955258  | -3.73594301 | 1.06672216  |
| Si | Y | 3.12459539  | 3.74092385  | -1.2404936  |
| Si | Y | 7.36350878  | -1.54654415 | 1.57241944  |
| Si | Y | 5.20529745  | 3.74314059  | 1.06282743  |
| Si | Y | 7.36133708  | 1.55746949  | 1.5716297   |
| Si | Y | 3.1297947   | -3.7381368  | -1.23752062 |
| O  | N | 0.2489546   | -1.86281098 | -3.18906316 |
| O  | N | 0.24785918  | 1.86295843  | -3.18862078 |
| O  | N | -3.24748519 | -0.00032465 | 2.3161802   |
| O  | Y | -4.13172738 | -2.01081735 | -1.6741517  |
| H  | Y | -3.81158911 | -4.24576407 | -2.69033982 |
| H  | Y | -6.27398918 | -2.3352755  | -0.47639148 |
| O  | Y | -2.29627935 | -2.46627087 | -3.50052881 |
| Si | Y | -3.09769949 | -3.09856576 | -2.25576495 |
| Si | Y | -5.08883481 | -1.55370755 | -0.4641359  |
| O  | N | -0.11919901 | -4.2585798  | 0.71100524  |
| H  | Y | 3.83636008  | -4.29476267 | -2.33597219 |
| H  | Y | 0.80107032  | -6.65415456 | 0.39747564  |
| O  | N | -2.06472869 | -3.4864235  | -1.08115543 |
| H  | Y | 1.81226062  | -5.09922015 | 1.79075532  |
| Al | N | -0.95670559 | -2.91408118 | 0.08596859  |
| Si | Y | 1.14001836  | -5.28410806 | 0.55418852  |
| O  | Y | -5.47363452 | -0.00185857 | -0.64244171 |
| O  | N | -3.30005928 | 2.26499538  | 3.41487771  |
| O  | N | -4.34412082 | 1.95012297  | 0.95315026  |
| Si | N | -3.14350899 | 1.5620349   | 1.96622435  |

|    |   |             |             |             |
|----|---|-------------|-------------|-------------|
| O  | Y | -4.12026126 | -0.00017032 | 4.9359731   |
| O  | N | -3.2985142  | -2.26539289 | 3.4156819   |
| H  | Y | -4.73431837 | 2.35796849  | 5.37541546  |
| H  | Y | -4.73289237 | -2.35904104 | 5.37444448  |
| O  | N | -4.34370828 | -1.95202246 | 0.95433226  |
| H  | Y | -2.52042522 | 1.73658368  | 5.68792352  |
| H  | Y | -2.51923399 | -1.73642779 | 5.68792479  |
| Si | N | -3.14299342 | -1.56278966 | 1.96682164  |
| Si | Y | -3.6769556  | 1.54617279  | 4.88640902  |
| Si | Y | -3.67623731 | -1.54684666 | 4.88717972  |
| O  | Y | -1.54405785 | 0.00013917  | -4.00343507 |
| H  | Y | -0.80896327 | 1.91147916  | -5.39484378 |
| H  | Y | -0.80746682 | -1.91160745 | -5.39419586 |
| Si | Y | -1.10076688 | 1.54527937  | -4.05401131 |
| Si | Y | -1.09933316 | -1.54533413 | -4.05384995 |
| O  | Y | -4.13305028 | 2.00926031  | -1.67544292 |
| H  | Y | -6.2759356  | 2.33173517  | -0.47616462 |
| H  | Y | -3.81428863 | 4.24427116  | -2.69143234 |
| O  | Y | -2.29901189 | 2.46697693  | -3.50027951 |
| Si | Y | -5.08960942 | 1.5512809   | -0.46491275 |
| Si | Y | -3.09927452 | 3.09730103  | -2.25590695 |
| O  | N | -0.12105639 | 4.25934637  | 0.71117871  |
| H  | Y | 0.79596258  | 6.6558964   | 0.39662469  |
| O  | N | -2.06664039 | 3.48524595  | -1.08085844 |
| H  | Y | 1.80933575  | 5.10184518  | 1.79074072  |
| Al | N | -0.95733947 | 2.913915    | 0.0855779   |
| Si | Y | 1.13671906  | 5.2868504   | 0.55351477  |
| O  | Y | 2.0965486   | -4.82617665 | -0.65637376 |
| H  | Y | 4.5043855   | -4.29320744 | 2.16522974  |
| H  | Y | 6.12377153  | -4.69509793 | 0.55490139  |
| O  | Y | 2.08912112  | 4.82782558  | -0.66025741 |
| H  | Y | 8.20827114  | -1.95093689 | 0.50535064  |
| H  | Y | 3.83061606  | 4.29807312  | -2.33859526 |
| H  | Y | 8.03611645  | -1.73060238 | 2.80968944  |
| H  | Y | 4.4980411   | 4.30090263  | 2.16044671  |
| H  | Y | 8.20583571  | 1.96207292  | 0.5039673   |
| H  | Y | 6.11782802  | 4.70373314  | 0.55033667  |
| H  | Y | 8.03358444  | 1.74340341  | 2.80820261  |

**Table S17 – Coordinates for DFT Model of MeOH-lattice complex (BEA)**

| <b>element</b> | <b>constrained during optimization?</b> | <b>X</b>    | <b>Y</b>    | <b>Z</b>    |
|----------------|-----------------------------------------|-------------|-------------|-------------|
| O              | N                                       | 0.23875467  | -1.90385893 | -0.51721361 |
| O              | N                                       | -1.5198645  | -2.21068051 | 1.45656972  |
| O              | N                                       | -1.73065459 | 2.40695958  | 1.35224349  |
| O              | N                                       | 0.07406308  | 1.99968837  | -0.5115548  |
| O              | N                                       | 0.67012203  | -1.12027788 | 2.05485961  |
| H              | N                                       | 0.90450173  | -1.07159549 | 1.11086445  |
| C              | N                                       | 0.95515199  | 0.10677302  | 2.7376365   |
| H              | N                                       | 0.40101404  | 0.93995993  | 2.30247832  |
| H              | N                                       | 0.65668452  | -0.03159447 | 3.77577931  |
| H              | N                                       | 2.02747897  | 0.31018569  | 2.7022753   |
| O              | N                                       | 1.51961619  | 0.05592869  | -1.62331749 |
| O              | N                                       | 2.45987781  | -2.35198205 | -1.93358611 |
| O              | N                                       | 2.36411832  | 2.46481477  | -1.82512686 |
| O              | Y                                       | 4.22915551  | -3.27591937 | -0.21362643 |
| O              | Y                                       | 6.0964446   | -2.4054383  | 1.41452962  |
| O              | Y                                       | 4.17450178  | 3.35017582  | -0.13469453 |
| O              | Y                                       | 7.03393322  | 0.04269235  | 1.26415211  |
| O              | Y                                       | 6.0561786   | 2.47206994  | 1.47279119  |
| Si             | N                                       | 1.0892969   | -1.50158883 | -1.82660282 |
| Si             | N                                       | 1.02391303  | 1.57578114  | -1.78341679 |
| Si             | Y                                       | 5.28943811  | -3.70700174 | 0.91728411  |
| Si             | Y                                       | 3.11319502  | 3.78110576  | -1.2659976  |
| Si             | Y                                       | 7.43380664  | -1.50719474 | 1.41830679  |
| Si             | Y                                       | 5.22818577  | 3.77127705  | 1.00590243  |
| Si             | Y                                       | 7.4080491   | 1.59647973  | 1.45575486  |
| Si             | Y                                       | 3.17530681  | -3.69719017 | -1.35551653 |
| O              | N                                       | 0.26091687  | -1.70512518 | -3.21352424 |
| O              | N                                       | 0.21916682  | 1.83384097  | -3.16743072 |
| O              | N                                       | -2.56433286 | 0.02387973  | 2.02492867  |
| O              | Y                                       | -4.10469942 | -2.02117826 | -1.66317382 |
| H              | Y                                       | -3.78275988 | -4.2410113  | -2.71144282 |
| H              | Y                                       | -6.22629729 | -2.37696199 | -0.43789189 |
| O              | Y                                       | -2.29330312 | -2.43997288 | -3.52194237 |
| Si             | Y                                       | -3.0710556  | -3.0937501  | -2.27317183 |
| Si             | Y                                       | -5.0469567  | -1.5864338  | -0.43355791 |
| O              | N                                       | -0.17691352 | -4.5231512  | 0.66988404  |
| H              | Y                                       | 3.86981072  | -4.23499799 | -2.47092361 |
| H              | Y                                       | 0.89345936  | -6.65094065 | 0.27775559  |
| O              | N                                       | -2.09802868 | -3.56244945 | -1.09604557 |

|    |   |             |             |             |
|----|---|-------------|-------------|-------------|
| H  | Y | 1.91360767  | -5.10541414 | 1.67499915  |
| Si | Y | 1.22426799  | -5.28012351 | 0.44635398  |
| O  | Y | -5.44646508 | -0.03550315 | -0.58683867 |
| O  | N | -3.29714147 | 2.09980697  | 3.4469828   |
| O  | N | -4.31584489 | 1.76826999  | 1.03490861  |
| Si | N | -2.99008699 | 1.59534208  | 1.94924238  |
| O  | Y | -4.01014734 | -0.09138108 | 4.96999909  |
| O  | N | -3.28935471 | -2.16909323 | 3.37432725  |
| H  | Y | -4.63524649 | 2.25641369  | 5.44789401  |
| H  | Y | -4.59800537 | -2.46017036 | 5.38876518  |
| O  | N | -4.19880959 | -1.84135853 | 0.95378636  |
| H  | Y | -2.41232223 | 1.64844772  | 5.71989027  |
| H  | Y | -2.38475639 | -1.82419115 | 5.67707486  |
| Si | N | -2.96605004 | -1.54127409 | 1.93314276  |
| Si | Y | -3.57907835 | 1.4588349   | 4.93350774  |
| Si | Y | -3.55485396 | -1.63386663 | 4.89609485  |
| O  | Y | -1.56736635 | 0.03813303  | -4.0054817  |
| H  | Y | -0.86774075 | 1.97191918  | -5.38405116 |
| H  | Y | -0.83716278 | -1.85066583 | -5.43053885 |
| Si | Y | -1.13644996 | 1.58742508  | -4.04372889 |
| Si | Y | -1.11161208 | -1.50339116 | -4.08181594 |
| O  | Y | -4.13655611 | 1.99843278  | -1.6148696  |
| H  | Y | -6.26370404 | 2.28962734  | -0.38013403 |
| H  | Y | -3.84997813 | 4.24812845  | -2.60784358 |
| O  | Y | -2.33356268 | 2.49254027  | -3.46086232 |
| Si | Y | -5.07142104 | 1.51840698  | -0.39608516 |
| Si | Y | -3.11979169 | 3.10157753  | -2.19702625 |
| O  | N | -0.24274896 | 4.41509503  | 0.64135128  |
| H  | Y | 0.78736313  | 6.65765559  | 0.44106939  |
| O  | N | -2.05663759 | 3.55213682  | -1.03672211 |
| H  | Y | 1.83319845  | 5.09462406  | 1.80074402  |
| Si | N | -0.98050381 | 3.09324406  | 0.08905518  |
| Si | Y | 1.14073013  | 5.28950495  | 0.57598897  |
| O  | Y | 2.15922116  | -4.80022698 | -0.77250045 |
| H  | Y | 4.60479882  | -4.28297412 | 2.01950834  |
| H  | Y | 6.20291051  | -4.65276467 | 0.38056317  |
| O  | Y | 2.07850708  | 4.85279502  | -0.6573162  |
| H  | Y | 8.26561914  | -1.89195121 | 0.33388733  |
| H  | Y | 3.79868734  | 4.35716721  | -2.36762779 |
| H  | Y | 8.12617099  | -1.70111838 | 2.64306214  |
| H  | Y | 4.53309132  | 4.31011366  | 2.12071506  |
| H  | Y | 8.23343945  | 2.02064593  | 0.38076733  |
| H  | Y | 6.12550395  | 4.74531503  | 0.49189284  |

|    |   |             |             |            |
|----|---|-------------|-------------|------------|
| H  | Y | 8.09722727  | 1.77252501  | 2.68443015 |
| H  | N | -0.69475622 | -1.73610267 | 1.86640164 |
| AI | N | -0.88050228 | -3.1437323  | 0.0021482  |

## References

1. G. I. Panov, V. I. Sobolev, A. S. Kharitonov, The role of iron in N<sub>2</sub>O decomposition on ZSM-5 zeolite and reactivity of the surface oxygen formed. *J. Mol. Catal.* **61**, 85–97 (1990). [doi:10.1016/0304-5102\(90\)85197-P](https://doi.org/10.1016/0304-5102(90)85197-P)
2. K. A. Dubkov, V. I. Sobolev, G. I. Panov, Low-temperature oxidation of methane to methanol on FeZSM-5 zeolite. *Kinet. Catal.* **39**, 72–79 (1998).
3. M. O. Ross, A. C. Rosenzweig, A tale of two methane monooxygenases. *J. Biol. Inorg. Chem.* **22**, 307–319 (2017). [doi:10.1007/s00775-016-1419-y](https://doi.org/10.1007/s00775-016-1419-y) [Medline](#)
4. B. E. R. Snyder, M. L. Bols, R. A. Schoonheydt, B. F. Sels, E. I. Solomon, Iron and Copper Active Sites in Zeolites and Their Correlation to Metalloenzymes. *Chem. Rev.* **118**, 2718–2768 (2018). [doi:10.1021/acs.chemrev.7b00344](https://doi.org/10.1021/acs.chemrev.7b00344) [Medline](#)
5. R. Banerjee, Y. Proshlyakov, J. D. Lipscomb, D. A. Proshlyakov, Structure of the key species in the enzymatic oxidation of methane to methanol. *Nature* **518**, 431–434 (2015). [doi:10.1038/nature14160](https://doi.org/10.1038/nature14160) [Medline](#)
6. B. E. R. Snyder, P. Vanelderen, M. L. Bols, S. D. Hallaert, L. H. Böttger, L. Ungur, K. Pierloot, R. A. Schoonheydt, B. F. Sels, E. I. Solomon, The active site of low-temperature methane hydroxylation in iron-containing zeolites. *Nature* **536**, 317–321 (2016). [doi:10.1038/nature19059](https://doi.org/10.1038/nature19059) [Medline](#)
7. B. E. R. Snyder, L. H. Böttger, M. L. Bols, J. J. Yan, H. M. Rhoda, A. B. Jacobs, M. Y. Hu, J. Zhao, E. E. Alp, B. Hedman, K. O. Hodgson, R. A. Schoonheydt, B. F. Sels, E. I. Solomon, Structural characterization of a non-heme iron active site in zeolites that hydroxylates methane. *Proc. Natl. Acad. Sci. U.S.A.* **115**, 4565–4570 (2018). [doi:10.1073/pnas.1721717115](https://doi.org/10.1073/pnas.1721717115) [Medline](#)
8. M. L. Bols, S. D. Hallaert, B. E. R. Snyder, J. Devos, D. Plessers, H. M. Rhoda, M. Dusselier, R. A. Schoonheydt, K. Pierloot, E. I. Solomon, B. F. Sels, Spectroscopic Identification of the  $\alpha$ -Fe/ $\alpha$ -O Active Site in Fe-CHA Zeolite for the Low-Temperature Activation of the Methane C-H Bond. *J. Am. Chem. Soc.* **140**, 12021–12032 (2018). [doi:10.1021/jacs.8b05877](https://doi.org/10.1021/jacs.8b05877) [Medline](#)
9. B. E. R. Snyder, M. L. Bols, H. M. Rhoda, P. Vanelderen, L. H. Böttger, A. Braun, J. J. Yan, R. G. Hadt, J. T. Babicz Jr., M. Y. Hu, J. Zhao, E. E. Alp, B. Hedman, K. O. Hodgson, R. A. Schoonheydt, B. F. Sels, E. I. Solomon, Mechanism of selective benzene hydroxylation catalyzed by iron-containing zeolites. *Proc. Natl. Acad. Sci. U.S.A.* **115**, 12124–12129 (2018). [doi:10.1073/pnas.1813849115](https://doi.org/10.1073/pnas.1813849115) [Medline](#)
10. M. V. Parfenov, E. V. Starokon, L. V. Pirutko, G. I. Panov, Quasicatalytic and catalytic oxidation of methane to methanol by nitrous oxide over FeZSM-5 zeolite. *J. Catal.* **318**, 14–21 (2014). [doi:10.1016/j.jcat.2014.07.009](https://doi.org/10.1016/j.jcat.2014.07.009)

11. B. R. Wood, J. A. Reimer, A. T. Bell, M. T. Janicke, K. C. Ott, Nitrous oxide decomposition and surface oxygen formation on Fe-ZSM-5. *J. Catal.* **224**, 148–155 (2004). [doi:10.1016/j.jcat.2004.02.025](https://doi.org/10.1016/j.jcat.2004.02.025)
12. X. Huang, J. T. Groves, Beyond ferryl-mediated hydroxylation: 40 years of the rebound mechanism and C-H activation. *JBIC J. Biol. Inorg. Chem.* **22**, 185–207 (2017). [doi:10.1007/s00775-016-1414-3](https://doi.org/10.1007/s00775-016-1414-3) [Medline](#)
13. M. Srncic, E. I. Solomon, Frontier Molecular Orbital Contributions to Chlorination versus Hydroxylation Selectivity in the Non-Heme Iron Halogenase SyrB2. *J. Am. Chem. Soc.* **139**, 2396–2407 (2017). [doi:10.1021/jacs.6b11995](https://doi.org/10.1021/jacs.6b11995) [Medline](#)
14. M. L. Neidig, A. Decker, O. W. Choroba, F. Huang, M. Kavana, G. R. Moran, J. B. Spencer, E. I. Solomon, Spectroscopic and electronic structure studies of aromatic electrophilic attack and hydrogen-atom abstraction by non-heme iron enzymes. *Proc. Natl. Acad. Sci. U.S.A.* **103**, 12966–12973 (2006). [doi:10.1073/pnas.0605067103](https://doi.org/10.1073/pnas.0605067103) [Medline](#)
15. H. M. Key, P. Dydio, D. S. Clark, J. F. Hartwig, Abiological catalysis by artificial haem proteins containing noble metals in place of iron. *Nature* **534**, 534–537 (2016). [doi:10.1038/nature17968](https://doi.org/10.1038/nature17968) [Medline](#)
16. R. L. Shook, A. S. Borovik, Role of the secondary coordination sphere in metal-mediated dioxygen activation. *Inorg. Chem.* **49**, 3646–3660 (2010). [doi:10.1021/ic901550k](https://doi.org/10.1021/ic901550k) [Medline](#)
17. J. P. Collman, R. Boulatov, C. J. Sunderland, L. Fu, Functional analogues of cytochrome c oxidase, myoglobin, and hemoglobin. *Chem. Rev.* **104**, 561–588 (2004). [doi:10.1021/cr0206059](https://doi.org/10.1021/cr0206059) [Medline](#)
18. D. Fiedler, D. H. Leung, R. G. Bergman, K. N. Raymond, Selective molecular recognition, C-H bond activation, and catalysis in nanoscale reaction vessels. *Acc. Chem. Res.* **38**, 349–358 (2005). [doi:10.1021/ar040152p](https://doi.org/10.1021/ar040152p) [Medline](#)
19. P. Vanelderen, B. E. R. Snyder, M.-L. Tsai, R. G. Hadt, J. Vancauwenbergh, O. Coussens, R. A. Schoonheydt, B. F. Sels, E. I. Solomon, Spectroscopic definition of the copper active sites in mordenite: Selective methane oxidation. *J. Am. Chem. Soc.* **137**, 6383–6392 (2015). [doi:10.1021/jacs.5b02817](https://doi.org/10.1021/jacs.5b02817) [Medline](#)
20. B. E. R. Snyder, P. Vanelderen, R. A. Schoonheydt, B. F. Sels, E. I. Solomon, Second-Sphere Effects on Methane Hydroxylation in Cu-Zeolites. *J. Am. Chem. Soc.* **140**, 9236–9243 (2018). [doi:10.1021/jacs.8b05320](https://doi.org/10.1021/jacs.8b05320) [Medline](#)
21. D. J. Xiao, J. Oktawiec, P. J. Milner, J. R. Long, Pore Environment Effects on Catalytic Cyclohexane Oxidation in Expanded Fe<sub>2</sub>(dobdc) Analogues. *J. Am. Chem. Soc.* **138**, 14371–14379 (2016). [doi:10.1021/jacs.6b08417](https://doi.org/10.1021/jacs.6b08417) [Medline](#)



22. E. G. Derouane, Shape selectivity in catalysis by zeolites: The nest effect. *J. Catal.* **100**, 541–544 (1986). [doi:10.1016/0021-9517\(86\)90127-2](https://doi.org/10.1016/0021-9517(86)90127-2)
23. B. Chen, S. Xiang, G. Qian, Metal-organic frameworks with functional pores for recognition of small molecules. *Acc. Chem. Res.* **43**, 1115–1124 (2010). [doi:10.1021/ar100023y](https://doi.org/10.1021/ar100023y)  
[Medline](#)
24. F. Göttl, C. Michel, P. C. Andrikopoulos, A. M. Love, J. Hafner, I. Hermans, P. Sautet, Computationally Exploring Confinement Effects in the Methane-to-Methanol Conversion Over Iron-Oxo Centers in Zeolites. *ACS Catal.* **6**, 8404–8409 (2016).  
[doi:10.1021/acscatal.6b02640](https://doi.org/10.1021/acscatal.6b02640)
25. M. H. Mahyuddin, A. Staykov, Y. Shiota, M. Miyanishi, K. Yoshizawa, Roles of Zeolite Confinement and Cu–O–Cu Angle on the Direct Conversion of Methane to Methanol by [Cu<sub>2</sub>(μ-O)]<sup>2+</sup>-Exchanged AEI, CHA, AFX, and MFI Zeolites. *ACS Catal.* **7**, 3741–3751 (2017). [doi:10.1021/acscatal.7b00588](https://doi.org/10.1021/acscatal.7b00588)
26. J. F. Haw, W. Song, D. M. Marcus, J. B. Nicholas, The mechanism of methanol to hydrocarbon catalysis. *Acc. Chem. Res.* **36**, 317–326 (2003). [doi:10.1021/ar020006o](https://doi.org/10.1021/ar020006o)  
[Medline](#)
27. S. M. Csicsery, Shape-selective catalysis in zeolites. *Zeolites* **4**, 202–213 (1984).  
[doi:10.1016/0144-2449\(84\)90024-1](https://doi.org/10.1016/0144-2449(84)90024-1)
28. J. M. Newsam, M. M. Treacy, W. T. Koetsier, C. B. De Gruyter, Structural characterization of zeolite beta. *Proc. R. Soc. London Ser. A* **420**, 375–405 (1988).
29. C. W. Kammeyer, D. R. Whitman, Quantum mechanical calculation of molecular radii. I. Hydrides of elements of periodic groups IV through VII. *J. Chem. Phys.* **56**, 4419–4421 (1972). [doi:10.1063/1.1677883](https://doi.org/10.1063/1.1677883)
30. M. T. Green, Application of Badger's rule to heme and non-heme iron-oxygen bonds: An examination of ferryl protonation states. *J. Am. Chem. Soc.* **128**, 1902–1906 (2006).  
[doi:10.1021/ja054074s](https://doi.org/10.1021/ja054074s) [Medline](#)
31. E. V. Starokon, M. V. Parfenov, S. S. Arzumanov, L. V. Pirutko, A. G. Stepanov, G. I. Panov, Oxidation of methane to methanol on the surface of FeZSM-5 zeolite. *J. Catal.* **300**, 47–54 (2013). [doi:10.1016/j.jcat.2012.12.030](https://doi.org/10.1016/j.jcat.2012.12.030)
32. G. I. Panov, K. A. Dubkov, Y. A. Paukshtis, in *Catalysis by Unique Metal Ion Structures in Solid Matrices: From Science to Application*, G. Centi, B. Wichterlová, A. T. Bell, Eds. (Springer, 2001), pp. 149–163.
33. G. I. Panov, E. V. Starokon, L. V. Pirutko, E. A. Paukshtis, V. N. Parmon, New reaction of anion radicals O<sup>•-</sup> with water on the surface of FeZSM-5. *J. Catal.* **254**, 110–120 (2008).  
[doi:10.1016/j.jcat.2007.12.001](https://doi.org/10.1016/j.jcat.2007.12.001)

34. B. Snyder, M. Bols, H. Rhoda, D. Plessers, R. Schoonheydt, B. Sels, E. Solomon, Raw spectroscopic data for “Cage effects control the mechanism of methane hydroxylation in zeolites”. Zenodo (2021), doi: 10.5281/zenodo.4735834.
35. J. E. Schmidt, M. A. Deimund, D. Xie, M. E. Davis, Synthesis of RTH-Type Zeolites Using a Diverse Library of Imidazolium Cations. *Chem. Mater.* **27**, 3756–3762 (2015). [doi:10.1021/acs.chemmater.5b01003](https://doi.org/10.1021/acs.chemmater.5b01003)
36. S. D. Hallaert, M. L. Bols, P. Vanelderen, R. A. Schoonheydt, B. F. Sels, K. Pierloot, Identification of  $\alpha$ -Fe in High-Silica Zeolites on the Basis of ab Initio Electronic Structure Calculations. *Inorg. Chem.* **56**, 10681–10690 (2017). [doi:10.1021/acs.inorgchem.7b01653](https://doi.org/10.1021/acs.inorgchem.7b01653) [Medline](#)
37. M. J. Frisch *et al.*, Gaussian09 (Gaussian Inc., 2009).
38. C. Baerlocher, L. B. McCusker, Database of Zeolite Structures; [www.iza-structure.org/databases/](http://www.iza-structure.org/databases/).
39. S. Grimme, J. Antony, S. Ehrlich, H. Krieg, A consistent and accurate ab initio parametrization of density functional dispersion correction (DFT-D) for the 94 elements H-Pu. *J. Chem. Phys.* **132**, 154104 (2010). [doi:10.1063/1.3382344](https://doi.org/10.1063/1.3382344) [Medline](#)
